# Supplementary material for: Mapping the hidden diversity of the Geophagus sensu stricto species group (Cichlidae: Geophagini) from the Amazon basin
Source: PeerJ. 2021 Nov 30;9:e12443. doi: 10.7717/peerj.12443 (PMC8641480; doi:10.7717/peerj.12443)
Supplement: Supplemental Information 1 [file peerj-09-12443-s001.xlsx]

## Sheet: Supplemental Table S1
usar	otherCatalogNumbers	CatalogNumbers	institutionCode	collectionCode	basisOfRecord	typeStatus	scientificName	kingdom	phylum	class	order	family	genus	specificEpithet	taxonRank	identificationQualifier	taxonRemarks	identifiedBy	decimalLatitude	decimalLongitude	country	stateProvince	waterBody	eventDate	locality	areaDelimitation	riverSection	recordedBy	associatedSequences	identifier
TRUE	145	145	UFAM	CTGA	MaterialSample	Other material	Gephagus steindachneri	Animalia	Chordata	Actinopterygii	Cichliformes	Cichlidae	Geophagus	steindachneri	species	NA	NA	Farias, Izeni Pires	NA	NA	Brazil	NA	NA	NA	NA	NA	NA	NA	145	145
TRUE	BNAF15209	BNAF15209	Bold	NA	MaterialSample	Other material	Geophagus altifrons	Animalia	Chordata	Actinopterygii	Cichliformes	Cichlidae	Geophagus	altifrons	species	NA	identified as Geophagus surinamensis in Bold	Julien April	NA	NA	NA	NA	NA	NA	NA	NA	NA	NA	BNAF15209	BNAF15209
TRUE	BNAF15309	BNAF15309	Bold	NA	MaterialSample	Other material	Geophagus altifrons	Animalia	Chordata	Actinopterygii	Cichliformes	Cichlidae	Geophagus	altifrons	species	NA	identified as Geophagus surinamensis in Bold	Julien April	NA	NA	NA	NA	NA	NA	NA	NA	NA	NA	BNAF15309	BNAF15309
TRUE	DSFRE13808	DSFRE13808	Bold	NA	MaterialSample	Other material	Geophagus dicrozoster	Animalia	Chordata	Actinopterygii	Cichliformes	Cichlidae	Geophagus	dicrozoster	species	NA	NA	Oliver Lucanus	NA	NA	Venezuela	NA	NA	NA	NA	NA	NA	NA	DSFRE13808	DSFRE13808
TRUE	DSFRE17008	DSFRE17008	Bold	NA	MaterialSample	Other material	NA	Animalia	Chordata	Actinopterygii	Cichliformes	Cichlidae	Geophagus		genus	sp 1	identified as Geophagus dicrozoster in Bold	Oliver Lucanus	NA	NA	NA	NA	NA	NA	NA	NA	NA	NA	DSFRE17008	DSFRE17008
TRUE	DSFRE17108	DSFRE17108	Bold	NA	MaterialSample	Other material	NA	Animalia	Chordata	Actinopterygii	Cichliformes	Cichlidae	Geophagus		genus	sp 1	identified as Geophagus dicrozoster in Bold	Oliver Lucanus	NA	NA	NA	NA	NA	NA	NA	NA	NA	NA	DSFRE17108	DSFRE17108
TRUE	DSFRE19608	DSFRE19608	Bold	NA	MaterialSample	Other material	Geophagus altifrons	Animalia	Chordata	Actinopterygii	Cichliformes	Cichlidae	Geophagus	altifrons	species	NA	identified as Geophagus surinamensis in Bold	Oliver Lucanus	NA	NA	Brazil	NA	NA	NA	Brazil	NA	NA	NA	DSFRE19608	DSFRE19608
TRUE	FUPR93109	FUPR93109	Bold	NA	MaterialSample	Other material	Geophagus sveni	Animalia	Chordata	Actinopterygii	Cichliformes	Cichlidae	Geophagus	sveni	species	NA	identified as Geophagus proximus in Bold	Claudio Oliveira	-254198	-545356	Brazil	Parana	Upper Parana	NA	Foz do Iguacu- Itaipu Lake- Paraná, Brazil	46-Paraná-Paraguay	Lower Parana-Paraguay	NA	FUPR93109	FUPR93109
TRUE	FUPR93209	FUPR93209	Bold	NA	MaterialSample	Other material	Geophagus sveni	Animalia	Chordata	Actinopterygii	Cichliformes	Cichlidae	Geophagus	sveni	species	NA	identified as Geophagus proximus in Bold	Claudio Oliveira	-254198	-545356	Brazil	Parana	Upper Parana	NA	Foz do Iguacu- Itaipu Lake- Paraná, Brazil	46-Paraná-Paraguay	Lower Parana-Paraguay	NA	FUPR93209	FUPR93209
TRUE	FUPR93309	FUPR93309	Bold	NA	MaterialSample	Other material	Geophagus sveni	Animalia	Chordata	Actinopterygii	Cichliformes	Cichlidae	Geophagus	sveni	species	NA	identified as Geophagus proximus in Bold	Claudio Oliveira	-212456	-482973	Brazil	Sao Paulo	Upper Parana	NA	Jaboticabal- Upper Parana basin, São Paulo, Brazil	46-Paraná-Paraguay	Lower Parana-Paraguay	R Devide	FUPR93309	FUPR93309
TRUE	FUPR93409	FUPR93409	Bold	NA	MaterialSample	Other material	Geophagus sveni	Animalia	Chordata	Actinopterygii	Cichliformes	Cichlidae	Geophagus	sveni	species	NA	identified as Geophagus proximus in Bold	Claudio Oliveira	-212456	-482973	Brazil	Sao Paulo	Upper Parana	NA	Jaboticabal- Upper Parana basin, São Paulo, Brazil	46-Paraná-Paraguay	Lower Parana-Paraguay	R Devide	FUPR93409	FUPR93409
TRUE	FUPR93509	FUPR93509	Bold	NA	MaterialSample	Other material	Geophagus sveni	Animalia	Chordata	Actinopterygii	Cichliformes	Cichlidae	Geophagus	sveni	species	NA	identified as Geophagus proximus in Bold	Claudio Oliveira	-212456	-482973	Brazil	Sao Paulo	Upper Parana	NA	Jaboticabal- Upper Parana basin, São Paulo, Brazil	46-Paraná-Paraguay	Lower Parana-Paraguay	R Devide	FUPR93509	FUPR93509
TRUE	KU568829	KU568829	genbank	NA	MaterialSample	Other material	Geophagus altifrons	Animalia	Chordata	Actinopterygii	Cichliformes	Cichlidae	Geophagus	altifrons	species	NA	identified as Geophagus surinamensis in Genbank	Ernst Swartz	NA	NA	Brazil	NA	NA	NA	South Africa Western Cape	NA	NA	Ernst Swartz	KU568829	KU568829
TRUE	GU701784	GU701784	genbank	NA	MaterialSample	Other material	Geophagus sveni	Animalia	Chordata	Actinopterygii	Cichliformes	Cichlidae	Geophagus	sveni	species	NA	identified as Geophagus proximus in Genbank	Claudio Oliveira	-25419806	-54535611	Brasil	Paraná	Upper Parana		Paraná Lago Itaipu	46-Paraná-Paraguay	Lower Parana-Paraguay	NA	GU701784	GU701784
TRUE	KU568830	KU568830	genbank	NA	MaterialSample	Other material	Geophagus altifrons	Animalia	Chordata	Actinopterygii	Cichliformes	Cichlidae	Geophagus	altifrons	species	NA	identified as Geophagus surinamensis in Genbank	Ernst Swartz	NA	NA	Brazil	NA	NA	NA	South Africa Western Cape	NA	NA	Ernst Swartz	KU568830	KU568830
TRUE	MH780911	MH780911	genbank	NA	MaterialSample	Other material	Geophagus sveni	Animalia	Chordata	Actinopterygii	Cichliformes	Cichlidae	Geophagus	sveni	species	NA	NA	Benitez,M.F	-27354556	-55903889	Argentina	Misiones	Paraná	NA	Argentina: Misiones, Parana River	46-Paraná-Paraguay	Lower Parana-Paraguay	Mauricio F. Benitez, Juan C. Cerutti, Danilo R. Aichino, Diego Baldo	MH780911	MH780911
TRUE	MK012088	MK012088	genbank	NA	MaterialSample	Other material	Geophagus sveni	Animalia	Chordata	Actinopterygii	Cichliformes	Cichlidae	Geophagus	sveni	species	NA	NA	Benitez,M.F et al 2018	-10133222	-4831472	Brazil	Tocantins	Tocantins	NA	Tocantins, Palmas-Brazil	1-Upper Tocantins	Upper Tocantins	Mauricio F. Benitez, Juan C. Cerutti, Danilo R. Aichino, Diego Baldo	MK012088	MK012088
TRUE	KR150866	KR150866	genbank	NA	MaterialSample	Other material	Gephagus steindachneri	Animalia	Chordata	Actinopterygii	Cichliformes	Cichlidae	Geophagus	steindachneri	species	NA	NA	Musilova,Z and Starostova, Z	NA	NA	NA	NA	NA	NA	NA	NA	NA	NA	KR150866	KR150866
TRUE	DSFRE36908	DSFRE36908	Bold	NA	MaterialSample	Other material	Geophagus harreri	Animalia	Chordata	Actinopterygii	Cichliformes	Cichlidae	Geophagus	harreri	species	NA	NA	Oliver Lucanus and Raphael Covain	NA	NA	Guiana-Suriname	NA	Suriname	NA	NA	NA	NA	NA	DSFRE36908	DSFRE36908
TRUE	PARO17708	PARO17708	Bold	NA	MaterialSample	Other material	Geophagus argyrostictus	Animalia	Chordata	Actinopterygii	Cichliformes	Cichlidae	Geophagus	argyrostictus	species	NA	NA	Oliver Lucanus	NA	NA	Brazil	NA	Brazil	NA	NA	NA	NA	Oliver Lucanus	PARO17708	PARO17708
TRUE	PARO17808	PARO17808	Bold	NA	MaterialSample	Other material	Geophagus argyrostictus	Animalia	Chordata	Actinopterygii	Cichliformes	Cichlidae	Geophagus	argyrostictus	species	NA	NA	Oliver Lucanus	NA	NA	Brazil	NA	Brazil	NA	NA	NA	NA	Oliver Lucanus	PARO17808	PARO17808
TRUE	PARO17908	PARO17908	Bold	NA	MaterialSample	Other material	Geophagus argyrostictus	Animalia	Chordata	Actinopterygii	Cichliformes	Cichlidae	Geophagus	argyrostictus	species	NA	NA	Oliver Lucanus	NA	NA	Brazil	NA	Brazil	NA	NA	NA	NA	Oliver Lucanus	PARO17908	PARO17908
TRUE	PARO18008	PARO18008	Bold	NA	MaterialSample	Other material	Geophagus argyrostictus	Animalia	Chordata	Actinopterygii	Cichliformes	Cichlidae	Geophagus	argyrostictus	species	NA	NA	Oliver Lucanus	NA	NA	Brazil	NA	Brazil	NA	NA	NA	NA	Oliver Lucanus	PARO18008	PARO18008
TRUE	2744	2744	UFAM	CTGA	MaterialSample	Other material	Geophagus altifrons	Animalia	Chordata	Actinopterygii	Cichliformes	Cichlidae	Geophagus	altifrons	species	NA	NA	NA	-67724	-48952681	Brazil	NA	Araguaia	NA	Jatobá- Araguaia, Pará, Brazil	2-Araguaia	Middle-Lower Araguaia River	NA	2744	2744
TRUE	2748	2748	UFAM	CTGA	MaterialSample	Other material	Geophagus altifrons	Animalia	Chordata	Actinopterygii	Cichliformes	Cichlidae	Geophagus	altifrons	species	NA	NA	NA	-6148939	-48360739	Brazil	NA	Araguaia	NA	Santa Izabel- Araguaia Pará-Tocantins, Brazil	2-Araguaia	Lower Araguia River	NA	2748	2748
TRUE	2749	2749	UFAM	CTGA	MaterialSample	Other material	Geophagus altifrons	Animalia	Chordata	Actinopterygii	Cichliformes	Cichlidae	Geophagus	altifrons	species	NA	NA	NA	-6148939	-48360739	Brazil	NA	Araguaia	NA	Santa Izabel- Araguaia Pará-Tocantins, Brazil	2-Araguaia	Lower Araguia River	NA	2749	2749
TRUE	2750	2750	UFAM	CTGA	MaterialSample	Other material	Geophagus altifrons	Animalia	Chordata	Actinopterygii	Cichliformes	Cichlidae	Geophagus	altifrons	species	NA	NA	NA	-6148939	-48360739	Brazil	NA	Araguaia	NA	Santa Izabel- Araguaia Pará-Tocantins, Brazil	2-Araguaia	Lower Araguia River	NA	2750	2750
TRUE	2751	2751	UFAM	CTGA	MaterialSample	Other material	Geophagus altifrons	Animalia	Chordata	Actinopterygii	Cichliformes	Cichlidae	Geophagus	altifrons	species	NA	NA	NA	-6148939	-48360739	Brazil	NA	Araguaia	NA	Santa Izabel- Araguaia Pará-Tocantins, Brazil	2-Araguaia	Lower Araguia River	NA	2751	2751
TRUE	104696	104696	UFAM/INPA	SISBIOTA	MaterialSample	Other material	Geophagus altifrons	Animalia	Chordata	Actinopterygii	Cichliformes	Cichlidae	Geophagus	altifrons	species	NA	field identified as Geophagus cf. altifrons	NA	-3300833	-55305556	Brazil	NA	Tapajós	2013-08-26	Tapajós- Cametá- Pará, Brazil	9-Tapajós	Lower Tapajos	NA	104696	104696
TRUE	104036	104036	UFAM/INPA	SISBIOTA	MaterialSample	Other material	Geophagus megasema	Animalia	Chordata	Actinopterygii	Cichliformes	Cichlidae	Geophagus	megasema	species	NA	field identified as Geophagus cf. altifrons	L. Rapp Py-Daniel, et al.	-6318056	-63361944	Brazil	NA	Ipixuna	2012-08-18	Flona Ipixuna, Ipixuna river- Amazonas, Brazil	16-Purus	interfluvium Purus-Middle Madeira	NA	104036	104036
TRUE	104034	104034	UFAM/INPA	SISBIOTA	MaterialSample	Other material	Geophagus megasema	Animalia	Chordata	Actinopterygii	Cichliformes	Cichlidae	Geophagus	megasema	species	NA	field identified as Geophagus cf. altifrons	L. Rapp Py-Daniel, et al.	-6318056	-63361944	Brazil	NA	Ipixuna	2012-08-18	Flona Ipixuna, Ipixuna river- Amazonas, Brazil	16-Purus	interfluvium Purus-Middle Madeira	NA	104034	104034
TRUE	104035	104035	UFAM/INPA	SISBIOTA	MaterialSample	Other material	Geophagus megasema	Animalia	Chordata	Actinopterygii	Cichliformes	Cichlidae	Geophagus	megasema	species	NA	field identified as Geophagus cf. altifrons	L. Rapp Py-Daniel, et al.	-6318056	-63361944	Brazil	NA	Ipixuna	2012-08-18	Flona Ipixuna, Ipixuna river- Amazonas, Brazil	16-Purus	interfluvium Purus-Middle Madeira	NA	104035	104035
TRUE	30301	30301	INPA	ICT	MaterialSample	Other material	Geophagus altifrons	Animalia	Chordata	Actinopterygii	Cichliformes	Cichlidae	Geophagus	altifrons	species	NA	NA	NA	-4285069	-5860615	Brazil	NA	Abacaxi	NA	Abacaxi- Amazonas, Brazil	14-Middle-Lower Madeira	Lower Madeira	NA	30301	30301
TRUE	14626	14626	UFAM	CTGA	MaterialSample	Other material	Geophagus altifrons	Animalia	Chordata	Actinopterygii	Cichliformes	Cichlidae	Geophagus	altifrons	species	NA	field identified as Geophagus cf altifrons	NA	1176633	-61701756	Brazil	NA	Água Boa	NA	Água Boa- Roraima, Brazil	24-Branco	Lower-Middle Branco	NA	14626	14626
TRUE	14627	14627	UFAM	CTGA	MaterialSample	Other material	Geophagus altifrons	Animalia	Chordata	Actinopterygii	Cichliformes	Cichlidae	Geophagus	altifrons	species	NA	field identified as Geophagus cf altifrons	NA	1176633	-61701756	Brazil	NA	Água Boa	NA	Água Boa- Roraima, Brazil	24-Branco	Lower-Middle Branco	NA	14627	14627
TRUE	455	455	UFAM	CTGA	MaterialSample	Other material	Geophagus altifrons	Animalia	Chordata	Actinopterygii	Cichliformes	Cichlidae	Geophagus	altifrons	species	NA	NA	NA	-6148939	-48360739	Brazil	NA	Araguaia	NA	Araguaia,Pará-Tocantins, Brazil	2-Araguaia	Lower-Middle Araguaia	NA	455	455
TRUE	2796	2796	UFAM	CTGA	MaterialSample	Other material	Geophagus altifrons	Animalia	Chordata	Actinopterygii	Cichliformes	Cichlidae	Geophagus	altifrons	species	NA	NA	NA	-6148939	-48360739	Brazil	NA	Araguaia	NA	Araguaia,Pará-Tocantins, Brazil	2-Araguaia	Lower-Middle Araguaia	NA	2796	2796
TRUE	2799	2799	UFAM	CTGA	MaterialSample	Other material	Geophagus altifrons	Animalia	Chordata	Actinopterygii	Cichliformes	Cichlidae	Geophagus	altifrons	species	NA	NA	NA	-6148939	-48360739	Brazil	NA	Araguaia	NA	Araguaia,Pará-Tocantins, Brazil	2-Araguaia	Lower-Middle Araguaia	NA	2799	2799
TRUE	4604	4604	UFAM	CTGA	MaterialSample	Other material	Geophagus altifrons	Animalia	Chordata	Actinopterygii	Cichliformes	Cichlidae	Geophagus	altifrons	species	NA	NA	NA	-6896039	-49177819	Brazil	NA	Araguaia	NA	Araguaia,Pará-Tocantins, Brazil	2-Araguaia	Lower-Middle Araguaia	NA	4604	4604
TRUE	387	387	UFAM	CTGA	MaterialSample	Other material	Geophagus altifrons	Animalia	Chordata	Actinopterygii	Cichliformes	Cichlidae	Geophagus	altifrons	species	NA	NA	NA	-5400889	-48394278	Brazil	NA	Araguaia	NA	Araguaia,Pará-Tocantins, Brazil	2-Araguaia	Lower-Middle Araguaia	NA	387	387
TRUE	2825	2825	UFAM	CTGA	MaterialSample	Other material	Geophagus altifrons	Animalia	Chordata	Actinopterygii	Cichliformes	Cichlidae	Geophagus	altifrons	species	NA	NA	NA	-5400889	-48394278	Brazil	NA	Araguaia	NA	Araguaia,Pará-Tocantins, Brazil	2-Araguaia	Lower-Middle Araguaia	NA	2825	2825
TRUE	4386	4386	UFAM	CTGA	MaterialSample	Other material	Geophagus altifrons	Animalia	Chordata	Actinopterygii	Cichliformes	Cichlidae	Geophagus	altifrons	species	NA	NA	NA	-5400889	-48394278	Brazil	NA	Araguaia	NA	Araguaia,Pará-Tocantins, Brazil	2-Araguaia	Lower-Middle Araguaia	NA	4386	4386
TRUE	4599	4599	UFAM	CTGA	MaterialSample	Other material	Geophagus altifrons	Animalia	Chordata	Actinopterygii	Cichliformes	Cichlidae	Geophagus	altifrons	species	NA	NA	NA	-5362639	-48773389	Brazil	NA	Araguaia	NA	Confluence Araguaia-Tocantins rivers,Pará, Brazil	3-Lower Tocantins	confluence Araguaia-Tocantins	NA	4599	4599
TRUE	4600	4600	UFAM	CTGA	MaterialSample	Other material	Geophagus altifrons	Animalia	Chordata	Actinopterygii	Cichliformes	Cichlidae	Geophagus	altifrons	species	NA	NA	NA	-5362639	-48773389	Brazil	NA	Araguaia	NA	Confluence Araguaia-Tocantins rivers,Pará, Brazil	3-Lower Tocantins	confluence Araguaia-Tocantins	NA	4600	4600
TRUE	4601	4601	UFAM	CTGA	MaterialSample	Other material	Geophagus altifrons	Animalia	Chordata	Actinopterygii	Cichliformes	Cichlidae	Geophagus	altifrons	species	NA	NA	NA	-5362639	-48773389	Brazil	NA	Araguaia	NA	Confluence Araguaia-Tocantins rivers,Pará, Brazil	3-Lower Tocantins	confluence Araguaia-Tocantins	NA	4601	4601
TRUE	2161	2161	UFAM	CTGA	MaterialSample	Other material	Geophagus altifrons	Animalia	Chordata	Actinopterygii	Cichliformes	Cichlidae	Geophagus	altifrons	species	NA	NA	NA	850928	-51139278	Brazil	NA	Araguari	NA	Araguari-Ferreira Gomes, Amapá-Brazil	33-Araguari-Macari-Amapá	Araguari	NA	2161	2161
TRUE	2163	2163	UFAM	CTGA	MaterialSample	Other material	Geophagus altifrons	Animalia	Chordata	Actinopterygii	Cichliformes	Cichlidae	Geophagus	altifrons	species	NA	NA	NA	850928	-51139278	Brazil	NA	Araguari	NA	Araguari-Ferreira Gomes, Amapá-Brazil	33-Araguari-Macari-Amapá	Araguari	NA	2163	2163
TRUE	3282	3282	UFAM	CTGA	MaterialSample	Other material	Geophagus altifrons	Animalia	Chordata	Actinopterygii	Cichliformes	Cichlidae	Geophagus	altifrons	species	NA	NA	NA	-5602314	-48122031	Brazil	NA	Araguatins	2009-09-16	Araguatins-Tocantins, Brazil	2-Araguaia	Lower Araguaia	NA	3282	3282
TRUE	3281	3281	UFAM	CTGA	MaterialSample	Other material	Geophagus altifrons	Animalia	Chordata	Actinopterygii	Cichliformes	Cichlidae	Geophagus	altifrons	species	NA	NA	NA	-5602314	-48122031	Brazil	NA	Araguatins	2009-09-16	Araguatins-Tocantins, Brazil	2-Araguaia	Lower Araguaia	NA	3281	3281
TRUE	2164	2164	UFAM	CTGA	MaterialSample	Other material	NA	Animalia	Chordata	Actinopterygii	Cichliformes	Cichlidae	Geophagus		genus	sp 1	field identified as Geophagus altifrons	NA	-659772	-52528847	Brazil	NA	Arapiranga	NA	Arapiranga- Pará, Brazil	27-Jari	Arapiranga river near confluence with Jari river	NA	2164	2164
TRUE	2168	2168	UFAM	CTGA	MaterialSample	Other material	NA	Animalia	Chordata	Actinopterygii	Cichliformes	Cichlidae	Geophagus		genus	sp 1	field identified as Geophagus altifrons	NA	-659772	-52528847	Brazil	NA	Arapiranga	NA	Arapiranga- Pará, Brazil	27-Jari	Arapiranga river near confluence with Jari river	NA	2168	2168
TRUE	2158	2158	UFAM	CTGA	MaterialSample	Other material	Geophagus altifrons	Animalia	Chordata	Actinopterygii	Cichliformes	Cichlidae	Geophagus	altifrons	species	NA	NA	NA	-659772	-52528847	Brazil	NA	Arapiranga	NA	Arapiranga- Pará, Brazil	27-Jari	Arapiranga river near confluence with Jari river	NA	2158	2158
TRUE	2162	2162	UFAM	CTGA	MaterialSample	Other material	Geophagus altifrons	Animalia	Chordata	Actinopterygii	Cichliformes	Cichlidae	Geophagus	altifrons	species	NA	NA	NA	-659772	-52528847	Brazil	NA	Arapiranga	NA	Arapiranga- Pará, Brazil	27-Jari	Arapiranga river near confluence with Jari river	NA	2162	2162
TRUE	11528	11528	UNIR	GEN	MaterialSample	Other material	Geophagus mirabilis	Animalia	Chordata	Actinopterygii	Cichliformes	Cichlidae	Geophagus	mirabilis	species	NA	NA	NA	-10213772	-59457367	Brazil	NA	Aripuanã	NA	Aripuanã- near Dardabelos- Mato Grosso, Brazil	15-Madeira Shield Tributaries	Upper Aripunanã river	NA	11528	11528
TRUE	11531	11531	UNIR	GEN	MaterialSample	Other material	Geophagus mirabilis	Animalia	Chordata	Actinopterygii	Cichliformes	Cichlidae	Geophagus	mirabilis	species	NA	NA	NA	-10213772	-59457367	Brazil	NA	Aripuanã	NA	Aripuanã- near Dardabelos- Mato Grosso, Brazil	15-Madeira Shield Tributaries	Upper Aripunanã river	NA	11531	11531
TRUE	11529	11529	UNIR	GEN	MaterialSample	Other material	Geophagus mirabilis	Animalia	Chordata	Actinopterygii	Cichliformes	Cichlidae	Geophagus	mirabilis	species	NA	NA	NA	-10213772	-59457367	Brazil	NA	Aripuanã	NA	Aripuanã- near Dardabelos- Mato Grosso, Brazil	15-Madeira Shield Tributaries	Upper Aripunanã river	NA	11529	11529
TRUE	11530	11530	UNIR	GEN	MaterialSample	Other material	Geophagus mirabilis	Animalia	Chordata	Actinopterygii	Cichliformes	Cichlidae	Geophagus	mirabilis	species	NA	NA	NA	-10213772	-59457367	Brazil	NA	Aripuanã	NA	Aripuanã- near Dardabelos- Mato Grosso, Brazil	15-Madeira Shield Tributaries	Upper Aripunanã river	NA	11530	11530
TRUE	14864	14864	UNIR	GEN	MaterialSample	Other material	NA	Animalia	Chordata	Actinopterygii	Cichliformes	Cichlidae	Geophagus		genus	sp 1	field identified as cf Geophagus abalios	NA	-6957869	-60516592	Brazil	NA	Aripuanã	NA	Aripuanã- Lago Grande- Amazonas, Brazil	15-Madeira Shield Tributaries	Lower Aripuanã river	NA	14864	14864
TRUE	15166	15166	UNIR	GEN	MaterialSample	Other material	NA	Animalia	Chordata	Actinopterygii	Cichliformes	Cichlidae	Geophagus		genus	sp 1	field identified as cf Geophagus abalios	NA	-10162911	-59448581	Brazil	NA	Aripuanã	NA	Aripuanã- near Dardabelos- Mato Grosso, Brazil	15-Madeira Shield Tributaries	Upper Aripunanã river	NA	15166	15166
TRUE	11527	11527	UNIR	GEN	MaterialSample	Other material	Geophagus mirabilis	Animalia	Chordata	Actinopterygii	Cichliformes	Cichlidae	Geophagus	mirabilis	species	NA	NA	NA	-10213772	-59457367	Brazil	NA	Aripuanã	NA	Aripuanã- near Dardabelos- Mato Grosso, Brazil	15-Madeira Shield Tributaries	Upper Aripunanã river	NA	11527	11527
TRUE	14924	14924	UFAM	CTGA	MaterialSample	Other material	NA	Animalia	Chordata	Actinopterygii	Cichliformes	Cichlidae	Geophagus		genus	sp 5	NA	NA	-9782647	-59366533	Brazil	NA	Aripuanã	NA	Aripuanã- below Dardanelos Mato Grosso, Brazil	15-Madeira Shield Tributaries	Upper Aripunanã river	NA	14924	14924
TRUE	14925	14925	UFAM	CTGA	MaterialSample	Other material	NA	Animalia	Chordata	Actinopterygii	Cichliformes	Cichlidae	Geophagus		genus	sp 5	NA	NA	-9782647	-59366533	Brazil	NA	Aripuanã	NA	Aripuanã- below Dardanelos Mato Grosso, Brazil	15-Madeira Shield Tributaries	Upper Aripunanã river	NA	14925	14925
TRUE	14926	14926	UFAM	CTGA	MaterialSample	Other material	NA	Animalia	Chordata	Actinopterygii	Cichliformes	Cichlidae	Geophagus		genus	sp 1	field identified as cf Geophagus abalios	NA	-9782647	-59366533	Brazil	NA	Aripuanã	NA	Aripuanã- below Dardanelos Mato Grosso, Brazil	15-Madeira Shield Tributaries	Upper Aripunanã river	NA	14926	14926
TRUE	15184	15184	UFAM	CTGA	MaterialSample	Other material	NA	Animalia	Chordata	Actinopterygii	Cichliformes	Cichlidae	Geophagus		genus	sp 1	field identified as cf Geophagus abalios	NA	-10162911	-59448581	Brazil	NA	Aripuanã	NA	Aripuanã- below Dardanelos Mato Grosso, Brazil	15-Madeira Shield Tributaries	Upper Aripunanã river	NA	15184	15184
TRUE	15189	15189	UFAM	CTGA	MaterialSample	Other material	NA	Animalia	Chordata	Actinopterygii	Cichliformes	Cichlidae	Geophagus		genus	sp 1	field identified as cf Geophagus abalios	NA	-10162911	-59448581	Brazil	NA	Aripuanã	NA	Aripuanã- below Dardanelos Mato Grosso, Brazil	15-Madeira Shield Tributaries	Upper Aripunanã river	NA	15189	15189
TRUE	2160	2160	UFAM	CTGA	MaterialSample	Other material	NA	Animalia	Chordata	Actinopterygii	Cichliformes	Cichlidae	Geophagus		genus	sp 6	NA	NA	-9247236	-55983425	Brazil	NA	Azul	NA	Azul- Teles Pires- Pará, Brazil	7-Teles Pires	Lower Azul river- near confluence with Teles Pires	NA	2160	2160
TRUE	2183	2183	UFAM	CTGA	MaterialSample	Other material	NA	Animalia	Chordata	Actinopterygii	Cichliformes	Cichlidae	Geophagus		genus	sp 6	NA	NA	-9247236	-55983425	Brazil	NA	Azul	NA	Azul- Teles Pires- Pará, Brazil	7-Teles Pires	Lower Azul river- near confluence with Teles Pires	Stuart	2183	2183
TRUE	2186	2186	UFAM	CTGA	MaterialSample	Other material	NA	Animalia	Chordata	Actinopterygii	Cichliformes	Cichlidae	Geophagus		genus	sp 6	NA	NA	-9247236	-55983425	Brazil	NA	Azul	NA	Azul- Teles Pires- Pará, Brazil	7-Teles Pires	Lower Azul river- near confluence with Teles Pires	Stuart	2186	2186
TRUE	2187	2187	UFAM	CTGA	MaterialSample	Other material	NA	Animalia	Chordata	Actinopterygii	Cichliformes	Cichlidae	Geophagus		genus	sp 6	NA	NA	-9247236	-55983425	Brazil	NA	Azul	NA	Azul- Teles Pires- Pará, Brazil	7-Teles Pires	Lower Azul river- near confluence with Teles Pires	Stuart	2187	2187
TRUE	2188	2188	UFAM	CTGA	MaterialSample	Other material	NA	Animalia	Chordata	Actinopterygii	Cichliformes	Cichlidae	Geophagus		genus	sp 6	NA	NA	-9247236	-55983425	Brazil	NA	Azul	NA	Azul- Teles Pires- Pará, Brazil	7-Teles Pires	Lower Azul river- near confluence with Teles Pires	Stuart	2188	2188
TRUE	2189	2189	UFAM	CTGA	MaterialSample	Other material	NA	Animalia	Chordata	Actinopterygii	Cichliformes	Cichlidae	Geophagus		genus	sp 6	NA	NA	-9247236	-55983425	Brazil	NA	Azul	NA	Azul- Teles Pires- Pará, Brazil	7-Teles Pires	Lower Azul river- near confluence with Teles Pires	Stuart	2189	2189
TRUE	2184	2184	UFAM	CTGA	MaterialSample	Other material	NA	Animalia	Chordata	Actinopterygii	Cichliformes	Cichlidae	Geophagus		genus	sp 6	NA	NA	-9247236	-55983425	Brazil	NA	Azul	NA	Azul- Teles Pires- Pará, Brazil	7-Teles Pires	Lower Azul river- near confluence with Teles Pires	Stuart	2184	2184
TRUE	23655	23655	INPA	ICT	MaterialSample	Other material	NA	Animalia	Chordata	Actinopterygii	Cichliformes	Cichlidae	Geophagus		genus	sp 3	NA	NA	-3591667	-51765556	Brazil	NA	Bacajaí	NA	Bacajaí- Volta Grande Pará, Brazil	6-Lower Xingu	Near confluence Bacajaí with Xingu	NA	23655	23655
TRUE	26128	26128	INPA	ICT	MaterialSample	Other material	NA	Animalia	Chordata	Actinopterygii	Cichliformes	Cichlidae	Geophagus		genus	sp 3	NA	NA	-3586944	-51766667	Brazil	NA	Bacajaí	NA	Bacajaí- Volta Grande Pará, Brazil	6-Lower Xingu	Near confluence Bacajaí with Xingu	NA	26128	26128
TRUE	30771	30771	INPA	ICT	MaterialSample	Other material	Geophagus altifrons	Animalia	Chordata	Actinopterygii	Cichliformes	Cichlidae	Geophagus	altifrons	species	NA	field identified as Geophagus sveni	NA	-13158056	-47053611	Brazil	NA	Bezerra	NA	Bezerra- Goias-Tocantins, Brazil	1-Upper Tocantins	NA	NA	30771	30771
TRUE	12076	12076	UFAM	CTGA	MaterialSample	Other material	Geophagus altifrons	Animalia	Chordata	Actinopterygii	Cichliformes	Cichlidae	Geophagus	altifrons	species	NA	NA	NA	-934394	-61864358	Brazil	NA	Branco	2013-10-01	Branco- Roraima, Brazil	24-Branco	Lower Branco River	Valéria Machado, Joiciane Farias & Aline Ximenes	12076	12076
TRUE	14112	14112	UFAM	CTGA	MaterialSample	Other material	NA	Animalia	Chordata	Actinopterygii	Cichliformes	Cichlidae	Geophagus		genus	sp 1	NA	NA	2838097	-60626658	Brazil	NA	Branco	2013-10-01	Branco- Boa Vista- Roraima, Brazil	24-Branco	Upper Branco River	Valéria Machado, Joiciane Farias & Aline Ximenes	14112	14112
TRUE	14114	14114	UFAM	CTGA	MaterialSample	Other material	NA	Animalia	Chordata	Actinopterygii	Cichliformes	Cichlidae	Geophagus		genus	sp 1	NA	NA	2838097	-60626658	Brazil	NA	Branco	2013-10-01	Branco- Boa Vista- Roraima, Brazil	24-Branco	Upper Branco River	Valéria Machado, Joiciane Farias & Aline Ximenes	14114	14114
TRUE	14115	14115	UFAM	CTGA	MaterialSample	Other material	Geophagus winemilleri	Animalia	Chordata	Actinopterygii	Cichliformes	Cichlidae	Geophagus	winemilleri	species	NA	field identified as Geophagus sp 4	NA	2838097	-60626658	Brazil	NA	Branco	2013-10-01	Branco- Boa Vista- Roraima, Brazil	24-Branco	Upper Branco River	Valéria Machado, Joiciane Farias & Aline Ximenes	14115	14115
TRUE	14117	14117	UFAM	CTGA	MaterialSample	Other material	NA	Animalia	Chordata	Actinopterygii	Cichliformes	Cichlidae	Geophagus		genus	sp 1	NA	NA	2838097	-60626658	Brazil	NA	Branco	2013-10-01	Branco- Boa Vista- Roraima, Brazil	24-Branco	Upper Branco River	Valéria Machado, Joiciane Farias & Aline Ximenes	14117	14117
TRUE	14122	14122	UFAM	CTGA	MaterialSample	Other material	NA	Animalia	Chordata	Actinopterygii	Cichliformes	Cichlidae	Geophagus		genus	sp 1	NA	NA	2838097	-60626658	Brazil	NA	Branco	2013-10-01	Branco- Caracaraí- Roraima, Brazil	24-Branco	Middle Branco River	Valéria Machado, Joiciane Farias & Aline Ximenes	14122	14122
TRUE	14176	14176	UFAM	CTGA	MaterialSample	Other material	NA	Animalia	Chordata	Actinopterygii	Cichliformes	Cichlidae	Geophagus		genus	sp 1	NA	NA	1762892	-61133458	Brazil	NA	Branco	2013-10-01	Branco- Caracaraí- Roraima, Brazil	24-Branco	Middle Branco River	Valéria Machado, Joiciane Farias & Aline Ximenes	14176	14176
TRUE	14180	14180	UFAM	CTGA	MaterialSample	Other material	NA	Animalia	Chordata	Actinopterygii	Cichliformes	Cichlidae	Geophagus		genus	sp 1	NA	NA	1762892	-61133458	Brazil	NA	Branco	2013-10-01	Branco- Caracaraí- Roraima, Brazil	24-Branco	Middle Branco River	Valéria Machado, Joiciane Farias & Aline Ximenes	14180	14180
TRUE	14184	14184	UFAM	CTGA	MaterialSample	Other material	NA	Animalia	Chordata	Actinopterygii	Cichliformes	Cichlidae	Geophagus		genus	sp 1	NA	NA	1762892	-61133458	Brazil	NA	Branco	2013-10-01	Branco- Caracaraí- Roraima, Brazil	24-Branco	Middle Branco River	Valéria Machado, Joiciane Farias & Aline Ximenes	14184	14184
TRUE	14111	14111	UFAM	CTGA	MaterialSample	Other material	Geophagus winemilleri	Animalia	Chordata	Actinopterygii	Cichliformes	Cichlidae	Geophagus	winemilleri	species	NA	field identified as Geophagus sp 4	NA	2838097	-60626658	Brazil	NA	Branco	2013-10-01	Branco- Boa Vista- Roraima, Brazil	24-Branco	Upper Branco River	Valéria Machado, Joiciane Farias & Aline Ximenes	14111	14111
TRUE	14113	14113	UFAM	CTGA	MaterialSample	Other material	NA	Animalia	Chordata	Actinopterygii	Cichliformes	Cichlidae	Geophagus		genus	sp 1	NA	NA	2838097	-60626658	Brazil	NA	Branco	2013-10-01	Branco- Boa Vista- Roraima, Brazil	24-Branco	Upper Branco River	Valéria Machado, Joiciane Farias & Aline Ximenes	14113	14113
TRUE	14116	14116	UFAM	CTGA	MaterialSample	Other material	NA	Animalia	Chordata	Actinopterygii	Cichliformes	Cichlidae	Geophagus		genus	sp 1	NA	NA	2838097	-60626658	Brazil	NA	Branco	2013-10-01	Branco- Boa Vista- Roraima, Brazil	24-Branco	Upper Branco River	Valéria Machado, Joiciane Farias & Aline Ximenes	14116	14116
TRUE	14118	14118	UFAM	CTGA	MaterialSample	Other material	Geophagus winemilleri	Animalia	Chordata	Actinopterygii	Cichliformes	Cichlidae	Geophagus	winemilleri	species	NA	field identified as Geophagus sp 4	NA	2838097	-60626658	Brazil	NA	Branco	2013-10-01	Branco- Boa Vista- Roraima, Brazil	24-Branco	Upper Branco River	Valéria Machado, Joiciane Farias & Aline Ximenes	14118	14118
TRUE	14119	14119	UFAM	CTGA	MaterialSample	Other material	Geophagus winemilleri	Animalia	Chordata	Actinopterygii	Cichliformes	Cichlidae	Geophagus	winemilleri	species	NA	field identified as Geophagus sp 4	NA	2838097	-60626658	Brazil	NA	Branco	2013-10-01	Branco- Boa Vista- Roraima, Brazil	24-Branco	Upper Branco River	Valéria Machado, Joiciane Farias & Aline Ximenes	14119	14119
TRUE	14120	14120	UFAM	CTGA	MaterialSample	Other material	NA	Animalia	Chordata	Actinopterygii	Cichliformes	Cichlidae	Geophagus		genus	sp 1	NA	NA	2838097	-60626658	Brazil	NA	Branco	2013-10-01	Branco- Boa Vista- Roraima, Brazil	24-Branco	Upper Branco River	Valéria Machado, Joiciane Farias & Aline Ximenes	14120	14120
TRUE	14121	14121	UFAM	CTGA	MaterialSample	Other material	Geophagus winemilleri	Animalia	Chordata	Actinopterygii	Cichliformes	Cichlidae	Geophagus	winemilleri	species	NA	field identified as Geophagus sp 4	NA	2838097	-60626658	Brazil	NA	Branco	2013-10-01	Branco- Boa Vista- Roraima, Brazil	24-Branco	Upper Branco River	Valéria Machado, Joiciane Farias & Aline Ximenes	14121	14121
TRUE	14123	14123	UFAM	CTGA	MaterialSample	Other material	NA	Animalia	Chordata	Actinopterygii	Cichliformes	Cichlidae	Geophagus		genus	sp 1	NA	NA	2838097	-60626658	Brazil	NA	Branco	2013-10-01	Branco- Boa Vista- Roraima, Brazil	24-Branco	Upper Branco River	Valéria Machado, Joiciane Farias & Aline Ximenes	14123	14123
TRUE	14174	14174	UFAM	CTGA	MaterialSample	Other material	NA	Animalia	Chordata	Actinopterygii	Cichliformes	Cichlidae	Geophagus		genus	sp 1	NA	NA	1762892	-61133458	Brazil	NA	Branco	2013-10-01	Branco- Caracaraí- Roraima, Brazil	24-Branco	Middle Branco River	Valéria Machado, Joiciane Farias & Aline Ximenes	14174	14174
TRUE	14177	14177	UFAM	CTGA	MaterialSample	Other material	Geophagus winemilleri	Animalia	Chordata	Actinopterygii	Cichliformes	Cichlidae	Geophagus	winemilleri	species	NA	field identified as Geophagus sp 4	NA	1762892	-61133458	Brazil	NA	Branco	2013-10-01	Branco- Caracaraí- Roraima, Brazil	24-Branco	Middle Branco River	Valéria Machado, Joiciane Farias & Aline Ximenes	14177	14177
TRUE	14178	14178	UFAM	CTGA	MaterialSample	Other material	NA	Animalia	Chordata	Actinopterygii	Cichliformes	Cichlidae	Geophagus		genus	sp 1	NA	NA	1762892	-61133458	Brazil	NA	Branco	2013-10-01	Branco- Caracaraí- Roraima, Brazil	24-Branco	Middle Branco River	Valéria Machado, Joiciane Farias & Aline Ximenes	14178	14178
TRUE	14179	14179	UFAM	CTGA	MaterialSample	Other material	NA	Animalia	Chordata	Actinopterygii	Cichliformes	Cichlidae	Geophagus		genus	sp 1	NA	NA	1762892	-61133458	Brazil	NA	Branco	2013-10-01	Branco- Caracaraí- Roraima, Brazil	24-Branco	Middle Branco River	Valéria Machado, Joiciane Farias & Aline Ximenes	14179	14179
TRUE	14175	14175	UFAM	CTGA	MaterialSample	Other material	NA	Animalia	Chordata	Actinopterygii	Cichliformes	Cichlidae	Geophagus		genus	sp 1	NA	NA	1762892	-61133458	Brazil	NA	Branco	2013-10-01	Branco- Caracaraí- Roraima, Brazil	24-Branco	Middle Branco River	Valéria Machado, Joiciane Farias & Aline Ximenes	14175	14175
TRUE	14181	14181	UFAM	CTGA	MaterialSample	Other material	NA	Animalia	Chordata	Actinopterygii	Cichliformes	Cichlidae	Geophagus		genus	sp 1	NA	NA	1762892	-61133458	Brazil	NA	Branco	2013-10-01	Branco- Caracaraí- Roraima, Brazil	24-Branco	Middle Branco River	Valéria Machado, Joiciane Farias & Aline Ximenes	14181	14181
TRUE	14182	14182	UFAM	CTGA	MaterialSample	Other material	NA	Animalia	Chordata	Actinopterygii	Cichliformes	Cichlidae	Geophagus		genus	sp 1	NA	NA	1762892	-61133458	Brazil	NA	Branco	2013-10-01	Branco- Caracaraí- Roraima, Brazil	24-Branco	Middle Branco River	Valéria Machado, Joiciane Farias & Aline Ximenes	14182	14182
TRUE	14183	14183	UFAM	CTGA	MaterialSample	Other material	NA	Animalia	Chordata	Actinopterygii	Cichliformes	Cichlidae	Geophagus		genus	sp 1	NA	NA	1762892	-61133458	Brazil	NA	Branco	2013-10-01	Branco- Caracaraí- Roraima, Brazil	24-Branco	Middle Branco River	Valéria Machado, Joiciane Farias & Aline Ximenes	14183	14183
TRUE	12077	12077	UFAM	CTGA	MaterialSample	Other material	Geophagus altifrons	Animalia	Chordata	Actinopterygii	Cichliformes	Cichlidae	Geophagus	altifrons	species	NA	NA	NA	-934394	-61864358	Brazil	NA	Branco	2013-10-01	Branco- Roraima, Brazil	24-Branco	Lower Branco River	Valéria Machado, Joiciane Farias & Aline Ximenes	12077	12077
TRUE	12135	12135	UFAM	CTGA	MaterialSample	Other material	Geophagus altifrons	Animalia	Chordata	Actinopterygii	Cichliformes	Cichlidae	Geophagus	altifrons	species	NA	NA	NA	-934394	-61864358	Brazil	NA	Branco	2013-10-01	Branco- Roraima, Brazil	24-Branco	Lower Branco River	Valéria Machado, Joiciane Farias & Aline Ximenes	12135	12135
TRUE	12136	12136	UFAM	CTGA	MaterialSample	Other material	Geophagus altifrons	Animalia	Chordata	Actinopterygii	Cichliformes	Cichlidae	Geophagus	altifrons	species	NA	NA	NA	-934394	-61864358	Brazil	NA	Branco	2013-10-01	Branco- Roraima, Brazil	24-Branco	Lower Branco River	Valéria Machado, Joiciane Farias & Aline Ximenes	12136	12136
TRUE	16983	16983	UFAM	CTGA	MaterialSample	Other material	Geophagus proximus	Animalia	Chordata	Actinopterygii	Cichliformes	Cichlidae	Geophagus	proximus	species	NA	NA	NA	-32185	-59991031	Brazil	NA	Catalão	2018-02-01	Catalão- Amazonas, Brazil	28-Amazonas main channel	near confluence Amazonas-Negro	Francijara	16983	16983
TRUE	16984	16984	UFAM	CTGA	MaterialSample	Other material	Geophagus proximus	Animalia	Chordata	Actinopterygii	Cichliformes	Cichlidae	Geophagus	proximus	species	NA	NA	NA	-32185	-59991031	Brazil	NA	Catalão	2018-02-01	Catalão- Amazonas, Brazil	28-Amazonas main channel	near confluence Amazonas-Negro	Francijara	16984	16984
TRUE	3307	3307	UFAM	CTGA	MaterialSample	Other material	Geophagus megasema	Animalia	Chordata	Actinopterygii	Cichliformes	Cichlidae	Geophagus	megasema	species	NA	NA	NA	-12182806	-64584222	Brazil	NA	Cautário	NA	Cautário- Rondônia, Brazil	12-Guaporé	confluence Cautário-Guaporé	NA	3307	3307
TRUE	8016	8016	UFAM	CTGA	MaterialSample	Other material	Geophagus megasema	Animalia	Chordata	Actinopterygii	Cichliformes	Cichlidae	Geophagus	megasema	species	NA	NA	NA	-12182806	-64584222	Brazil	NA	Cautário	NA	Cautário- Rondônia, Brazil	12-Guaporé	confluence Cautário-Guaporé	NA	8016	8016
TRUE	8017	8017	UFAM	CTGA	MaterialSample	Other material	Geophagus megasema	Animalia	Chordata	Actinopterygii	Cichliformes	Cichlidae	Geophagus	megasema	species	NA	NA	NA	-12182806	-64584222	Brazil	NA	Cautário	NA	Cautário- Rondônia, Brazil	12-Guaporé	confluence Cautário-Guaporé	NA	8017	8017
TRUE	16989	16989	UFAM	CTGA	MaterialSample	Other material	Geophagus proximus	Animalia	Chordata	Actinopterygii	Cichliformes	Cichlidae	Geophagus	proximus	species	NA	NA	Ximenes, AM	-4087056	-63191647	Brazil	NA	Coari	2018-10-01	Coari- Amazonas, Brazil	28-Amazonas main channel	Coari Lake- Solimões River	Aline Ximenes	16989	16989
TRUE	16991	16991	UFAM	CTGA	MaterialSample	Other material	NA	Animalia	Chordata	Actinopterygii	Cichliformes	Cichlidae	Geophagus	proximus	species	NA	field identified as Geophagus cf altifrons	Ximenes, AM	-4087056	-63191647	Brazil	NA	Coari	2018-10-01	Coari- Amazonas, Brazil	28-Amazonas main channel	Coari Lake- Solimões River	Aline Ximenes	16991	16991
TRUE	16993	16993	UFAM	CTGA	MaterialSample	Other material	Geophagus proximus	Animalia	Chordata	Actinopterygii	Cichliformes	Cichlidae	Geophagus	proximus	species	NA	NA	Ximenes, AM	-4087056	-63191647	Brazil	NA	Coari	2018-10-01	Coari- Amazonas, Brazil	28-Amazonas main channel	Coari Lake- Solimões River	Aline Ximenes	16993	16993
TRUE	17036	17036	UFAM	CTGA	MaterialSample	Other material	Geophagus proximus	Animalia	Chordata	Actinopterygii	Cichliformes	Cichlidae	Geophagus	proximus	species	NA	NA	Ximenes, AM	-4087056	-63191647	Brazil	NA	Coari	2018-10-01	Coari- Amazonas, Brazil	28-Amazonas main channel	Coari Lake- Solimões River	Aline Ximenes	17036	17036
TRUE	17028	17028	UFAM	CTGA	MaterialSample	Other material	Geophagus proximus	Animalia	Chordata	Actinopterygii	Cichliformes	Cichlidae	Geophagus	proximus	species	NA	NA	Ximenes, AM	-4087056	-63191647	Brazil	NA	Coari	2018-10-01	Coari- Amazonas, Brazil	28-Amazonas main channel	Coari Lake- Solimões River	Aline Ximenes	17028	17028
TRUE	16990	16990	UFAM	CTGA	MaterialSample	Other material	Geophagus proximus	Animalia	Chordata	Actinopterygii	Cichliformes	Cichlidae	Geophagus	proximus	species	NA	NA	Ximenes, AM	-4087056	-63191647	Brazil	NA	Coari	2018-10-01	Coari- Amazonas, Brazil	28-Amazonas main channel	Coari Lake- Solimões River	Aline Ximenes	16990	16990
TRUE	16997	16997	UFAM	CTGA	MaterialSample	Other material	Geophagus proximus	Animalia	Chordata	Actinopterygii	Cichliformes	Cichlidae	Geophagus	proximus	species	NA	NA	Ximenes, AM	-4087056	-63191647	Brazil	NA	Coari	2018-10-01	Coari- Amazonas, Brazil	28-Amazonas main channel	Coari Lake- Solimões River	Aline Ximenes	16997	16997
TRUE	17009	17009	UFAM	CTGA	MaterialSample	Other material	Geophagus proximus	Animalia	Chordata	Actinopterygii	Cichliformes	Cichlidae	Geophagus	proximus	species	NA	NA	Ximenes, AM	-4087056	-63191647	Brazil	NA	Coari	2018-10-01	Coari- Amazonas, Brazil	28-Amazonas main channel	Coari Lake- Solimões River	Aline Ximenes	17009	17009
TRUE	16992	16992	UFAM	CTGA	MaterialSample	Other material	Geophagus proximus	Animalia	Chordata	Actinopterygii	Cichliformes	Cichlidae	Geophagus	proximus	species	NA	NA	Ximenes, AM	-4087056	-63191647	Brazil	NA	Coari	2018-10-01	Coari- Amazonas, Brazil	28-Amazonas main channel	Coari Lake- Solimões River	Aline Ximenes	16992	16992
TRUE	17015	17015	UFAM	CTGA	MaterialSample	Other material	Geophagus proximus	Animalia	Chordata	Actinopterygii	Cichliformes	Cichlidae	Geophagus	proximus	species	NA	NA	Ximenes, AM	-4087056	-63191647	Brazil	NA	Coari	2018-10-01	Coari- Amazonas, Brazil	28-Amazonas main channel	Coari Lake- Solimões River	Aline Ximenes	17015	17015
TRUE	16985	16985	UFAM	CTGA	MaterialSample	Other material	Geophagus proximus	Animalia	Chordata	Actinopterygii	Cichliformes	Cichlidae	Geophagus	proximus	species	NA	NA	Ximenes, AM	-4087056	-63191647	Brazil	NA	Coari	2018-10-01	Coari- Amazonas, Brazil	28-Amazonas main channel	Coari Lake- Solimões River	Aline Ximenes	16985	16985
TRUE	16994	16994	UFAM	CTGA	MaterialSample	Other material	Geophagus proximus	Animalia	Chordata	Actinopterygii	Cichliformes	Cichlidae	Geophagus	proximus	species	NA	NA	Ximenes, AM	-4087056	-63191647	Brazil	NA	Coari	2018-10-01	Coari- Amazonas, Brazil	28-Amazonas main channel	Coari Lake- Solimões River	Aline Ximenes	16994	16994
TRUE	16995	16995	UFAM	CTGA	MaterialSample	Other material	Geophagus proximus	Animalia	Chordata	Actinopterygii	Cichliformes	Cichlidae	Geophagus	proximus	species	NA	NA	Ximenes, AM	-4087056	-63191647	Brazil	NA	Coari	2018-10-01	Coari- Amazonas, Brazil	28-Amazonas main channel	Coari Lake- Solimões River	Aline Ximenes	16995	16995
TRUE	17013	17013	UFAM	CTGA	MaterialSample	Other material	Geophagus proximus	Animalia	Chordata	Actinopterygii	Cichliformes	Cichlidae	Geophagus	proximus	species	NA	NA	Ximenes, AM	-4087056	-63191647	Brazil	NA	Coari	2018-10-01	Coari- Amazonas, Brazil	28-Amazonas main channel	Coari Lake- Solimões River	Aline Ximenes	17013	17013
TRUE	17014	17014	UFAM	CTGA	MaterialSample	Other material	Geophagus proximus	Animalia	Chordata	Actinopterygii	Cichliformes	Cichlidae	Geophagus	proximus	species	NA	NA	Ximenes, AM	-4087056	-63191647	Brazil	NA	Coari	2018-10-01	Coari- Amazonas, Brazil	28-Amazonas main channel	Coari Lake- Solimões River	Aline Ximenes	17014	17014
TRUE	17016	17016	UFAM	CTGA	MaterialSample	Other material	Geophagus proximus	Animalia	Chordata	Actinopterygii	Cichliformes	Cichlidae	Geophagus	proximus	species	NA	NA	Ximenes, AM	-4087056	-63191647	Brazil	NA	Coari	2018-10-01	Coari- Amazonas, Brazil	28-Amazonas main channel	Coari Lake- Solimões River	Aline Ximenes	17016	17016
TRUE	17017	17017	UFAM	CTGA	MaterialSample	Other material	Geophagus proximus	Animalia	Chordata	Actinopterygii	Cichliformes	Cichlidae	Geophagus	proximus	species	NA	NA	Ximenes, AM	-4087056	-63191647	Brazil	NA	Coari	2018-10-01	Coari- Amazonas, Brazil	28-Amazonas main channel	Coari Lake- Solimões River	Aline Ximenes	17017	17017
TRUE	17018	17018	UFAM	CTGA	MaterialSample	Other material	Geophagus proximus	Animalia	Chordata	Actinopterygii	Cichliformes	Cichlidae	Geophagus	proximus	species	NA	NA	Ximenes, AM	-4087056	-63191647	Brazil	NA	Coari	2018-10-01	Coari- Amazonas, Brazil	28-Amazonas main channel	Coari Lake- Solimões River	Aline Ximenes	17018	17018
TRUE	17019	17019	UFAM	CTGA	MaterialSample	Other material	Geophagus proximus	Animalia	Chordata	Actinopterygii	Cichliformes	Cichlidae	Geophagus	proximus	species	NA	NA	Ximenes, AM	-4087056	-63191647	Brazil	NA	Coari	2018-10-01	Coari- Amazonas, Brazil	28-Amazonas main channel	Coari Lake- Solimões River	Aline Ximenes	17019	17019
TRUE	17021	17021	UFAM	CTGA	MaterialSample	Other material	Geophagus proximus	Animalia	Chordata	Actinopterygii	Cichliformes	Cichlidae	Geophagus	proximus	species	NA	NA	Ximenes, AM	-4087056	-63191647	Brazil	NA	Coari	2018-10-01	Coari- Amazonas, Brazil	28-Amazonas main channel	Coari Lake- Solimões River	Aline Ximenes	17021	17021
TRUE	17022	17022	UFAM	CTGA	MaterialSample	Other material	Geophagus proximus	Animalia	Chordata	Actinopterygii	Cichliformes	Cichlidae	Geophagus	proximus	species	NA	field identified as Geophagus megasema	Ximenes, AM	-4087056	-63191647	Brazil	NA	Coari	2018-10-01	Coari- Amazonas, Brazil	28-Amazonas main channel	Coari Lake- Solimões River	Aline Ximenes	17022	17022
TRUE	17024	17024	UFAM	CTGA	MaterialSample	Other material	Geophagus proximus	Animalia	Chordata	Actinopterygii	Cichliformes	Cichlidae	Geophagus	proximus	species	NA	NA	Ximenes, AM	-4087056	-63191647	Brazil	NA	Coari	2018-10-01	Coari- Amazonas, Brazil	28-Amazonas main channel	Coari Lake- Solimões River	Aline Ximenes	17024	17024
TRUE	17027	17027	UFAM	CTGA	MaterialSample	Other material	Geophagus proximus	Animalia	Chordata	Actinopterygii	Cichliformes	Cichlidae	Geophagus	proximus	species	NA	NA	Ximenes, AM	-4087056	-63191647	Brazil	NA	Coari	2018-10-01	Coari- Amazonas, Brazil	28-Amazonas main channel	Coari Lake- Solimões River	Aline Ximenes	17027	17027
TRUE	17029	17029	UFAM	CTGA	MaterialSample	Other material	Geophagus proximus	Animalia	Chordata	Actinopterygii	Cichliformes	Cichlidae	Geophagus	proximus	species	NA	NA	Ximenes, AM	-4087056	-63191647	Brazil	NA	Coari	2018-10-01	Coari- Amazonas, Brazil	28-Amazonas main channel	Coari Lake- Solimões River	Aline Ximenes	17029	17029
TRUE	17030	17030	UFAM	CTGA	MaterialSample	Other material	Geophagus proximus	Animalia	Chordata	Actinopterygii	Cichliformes	Cichlidae	Geophagus	proximus	species	NA	NA	Ximenes, AM	-4087056	-63191647	Brazil	NA	Coari	2018-10-01	Coari- Amazonas, Brazil	28-Amazonas main channel	Coari Lake- Solimões River	Aline Ximenes	17030	17030
TRUE	17031	17031	UFAM	CTGA	MaterialSample	Other material	Geophagus proximus	Animalia	Chordata	Actinopterygii	Cichliformes	Cichlidae	Geophagus	proximus	species	NA	NA	Ximenes, AM	-4087056	-63191647	Brazil	NA	Coari	2018-10-01	Coari- Amazonas, Brazil	28-Amazonas main channel	Coari Lake- Solimões River	Aline Ximenes	17031	17031
TRUE	17032	17032	UFAM	CTGA	MaterialSample	Other material	Geophagus proximus	Animalia	Chordata	Actinopterygii	Cichliformes	Cichlidae	Geophagus	proximus	species	NA	NA	Ximenes, AM	-4087056	-63191647	Brazil	NA	Coari	2018-10-01	Coari- Amazonas, Brazil	28-Amazonas main channel	Coari Lake- Solimões River	Aline Ximenes	17032	17032
TRUE	17033	17033	UFAM	CTGA	MaterialSample	Other material	Geophagus proximus	Animalia	Chordata	Actinopterygii	Cichliformes	Cichlidae	Geophagus	proximus	species	NA	NA	Ximenes, AM	-4087056	-63191647	Brazil	NA	Coari	2018-10-01	Coari- Amazonas, Brazil	28-Amazonas main channel	Coari Lake- Solimões River	Aline Ximenes	17033	17033
TRUE	17034	17034	UFAM	CTGA	MaterialSample	Other material	Geophagus proximus	Animalia	Chordata	Actinopterygii	Cichliformes	Cichlidae	Geophagus	proximus	species	NA	NA	Ximenes, AM	-4087056	-63191647	Brazil	NA	Coari	2018-10-01	Coari- Amazonas, Brazil	28-Amazonas main channel	Coari Lake- Solimões River	Aline Ximenes	17034	17034
TRUE	17035	17035	UFAM	CTGA	MaterialSample	Other material	Geophagus proximus	Animalia	Chordata	Actinopterygii	Cichliformes	Cichlidae	Geophagus	proximus	species	NA	NA	Ximenes, AM	-4087056	-63191647	Brazil	NA	Coari	2018-10-01	Coari- Amazonas, Brazil	28-Amazonas main channel	Coari Lake- Solimões River	Aline Ximenes	17035	17035
TRUE	17037	17037	UFAM	CTGA	MaterialSample	Other material	Geophagus proximus	Animalia	Chordata	Actinopterygii	Cichliformes	Cichlidae	Geophagus	proximus	species	NA	NA	Ximenes, AM	-4087056	-63191647	Brazil	NA	Coari	2018-10-01	Coari- Amazonas, Brazil	28-Amazonas main channel	Coari Lake- Solimões River	Aline Ximenes	17037	17037
TRUE	17116	17116	UFAM	CTGA	MaterialSample	Other material	Geophagus proximus	Animalia	Chordata	Actinopterygii	Cichliformes	Cichlidae	Geophagus	proximus	species	NA	NA	Ximenes, AM	-4087056	-63191647	Brazil	NA	Coari	2018-10-01	Coari- Amazonas, Brazil	28-Amazonas main channel	Coari Lake- Solimões River	Aline Ximenes	17116	17116
TRUE	17020	17020	UFAM	CTGA	MaterialSample	Other material	Geophagus proximus	Animalia	Chordata	Actinopterygii	Cichliformes	Cichlidae	Geophagus	proximus	species	NA	NA	Ximenes, AM	-4087056	-63191647	Brazil	NA	Coari	2018-10-01	Coari- Amazonas, Brazil	28-Amazonas main channel	Coari Lake- Solimões River	Aline Ximenes	17020	17020
TRUE	16996	16996	UFAM	CTGA	MaterialSample	Other material	Geophagus proximus	Animalia	Chordata	Actinopterygii	Cichliformes	Cichlidae	Geophagus	proximus	species	NA	NA	Ximenes, AM	-4087056	-63191647	Brazil	NA	Coari	2018-10-01	Coari- Amazonas, Brazil	28-Amazonas main channel	Coari Lake- Solimões River	Aline Ximenes	16996	16996
TRUE	17025	17025	UFAM	CTGA	MaterialSample	Other material	Geophagus proximus	Animalia	Chordata	Actinopterygii	Cichliformes	Cichlidae	Geophagus	proximus	species	NA	NA	Ximenes, AM	-4087056	-63191647	Brazil	NA	Coari	2018-10-01	Coari- Amazonas, Brazil	28-Amazonas main channel	Coari Lake- Solimões River	Aline Ximenes	17025	17025
TRUE	695	695	UNIR	GEN	MaterialSample	Other material	Geophagus megasema	Animalia	Chordata	Actinopterygii	Cichliformes	Cichlidae	Geophagus	megasema	species	NA	NA	NA	-8318444	-63497361	Brazil	NA	Cuniã	NA	Cuniã- Rondônia, Brazil	14-Middle-Lower Madeira	Cunia Lake-Middle Madeira/upper	NA	695	695
TRUE	15743	15743	UFAM	CTGA	MaterialSample	Other material	NA	Animalia	Chordata	Actinopterygii	Cichliformes	Cichlidae	Geophagus		genus	sp 1	field identified as Geophagus winemilleri	Ferreira, E & Zuanon, J	-423522	-62905503	Brazil	NA	Demeni	2016-02-01	Demeni- Amazonas, Brazil	23-Negro	Lower Demeni- Confluence middle Negro	Sarah Ventura & Aline Ximenes	15743	15743
TRUE	15744	15744	UFAM	CTGA	MaterialSample	Other material	NA	Animalia	Chordata	Actinopterygii	Cichliformes	Cichlidae	Geophagus		genus	sp 1	field identified as Geophagus winemilleri	Ferreira, E & Zuanon, J	-423522	-62905503	Brazil	NA	Demeni	2016-02-01	Demeni- Amazonas, Brazil	23-Negro	Lower Demeni- Confluence middle Negro	Sarah Ventura & Aline Ximenes	15744	15744
TRUE	15745	15745	UFAM	CTGA	MaterialSample	Other material	NA	Animalia	Chordata	Actinopterygii	Cichliformes	Cichlidae	Geophagus		genus	sp 1	field identified as Geophagus winemilleri	Ferreira, E & Zuanon, J	-423522	-62905503	Brazil	NA	Demeni	2016-02-01	Demeni- Amazonas, Brazil	23-Negro	Lower Demeni- Confluence middle Negro	Sarah Ventura & Aline Ximenes	15745	15745
TRUE	15746	15746	UFAM	CTGA	MaterialSample	Other material	NA	Animalia	Chordata	Actinopterygii	Cichliformes	Cichlidae	Geophagus		genus	sp 1	field identified as Geophagus winemilleri	Ferreira, E & Zuanon, J	-423522	-62905503	Brazil	NA	Demeni	2016-02-01	Demeni- Amazonas, Brazil	23-Negro	Lower Demeni- Confluence middle Negro	Sarah Ventura & Aline Ximenes	15746	15746
TRUE	15747	15747	UFAM	CTGA	MaterialSample	Other material	NA	Animalia	Chordata	Actinopterygii	Cichliformes	Cichlidae	Geophagus		genus	sp 1	field identified as Geophagus winemilleri	Ferreira, E & Zuanon, J	-423522	-62905503	Brazil	NA	Demeni	2016-02-01	Demeni- Amazonas, Brazil	23-Negro	Lower Demeni- Confluence middle Negro	Sarah Ventura & Aline Ximenes	15747	15747
TRUE	13142	13142	UFAM	CTGA	MaterialSample	Other material	NA	Animalia	Chordata	Actinopterygii	Cichliformes	Cichlidae	Geophagus		genus	sp 1	field identified as Geophagus aff winemilleri	NA	-4442761	-601165	Brazil	NA	Igapó-Açu	NA	Igapó-Açu- Amazonas, Brazil	14-Middle-Lower Madeira	interfluvium Lower Madeira	NA	13142	13142
TRUE	13022	13022	UFAM	CTGA	MaterialSample	Other material	NA	Animalia	Chordata	Actinopterygii	Cichliformes	Cichlidae	Geophagus		genus	sp 1	field identified as Geophagus aff winemilleri	NA	-4442761	-601165	Brazil	NA	Igapó-Açu	NA	Igapó-Açu- Amazonas, Brazil	14-Middle-Lower Madeira	interfluvium Lower Madeira	NA	13022	13022
TRUE	13172	13172	UFAM	CTGA	MaterialSample	Other material	NA	Animalia	Chordata	Actinopterygii	Cichliformes	Cichlidae	Geophagus		genus	sp 1	field identified as Geophagus aff winemilleri	NA	-4442761	-601165	Brazil	NA	Igapó-Açu	NA	Igapó-Açu- Amazonas, Brazil	14-Middle-Lower Madeira	interfluvium Lower Madeira	NA	13172	13172
TRUE	13215	13215	UFAM	CTGA	MaterialSample	Other material	NA	Animalia	Chordata	Actinopterygii	Cichliformes	Cichlidae	Geophagus		genus	sp 1	field identified as Geophagus aff winemilleri	NA	-4442761	-601165	Brazil	NA	Igapó-Açu	NA	Igapó-Açu- Amazonas, Brazil	14-Middle-Lower Madeira	interfluvium Lower Madeira	NA	13215	13215
TRUE	32020	32020	UFAM	CTGA	MaterialSample	Other material	Geophagus altifrons	Animalia	Chordata	Actinopterygii	Cichliformes	Cichlidae	Geophagus	altifrons	species	NA	field identified as Geophagus proximus	NA	-3015889	-600969	Brazil	NA	Tarumã-Açu	NA	Igarapé do Tarumã-Açu- Amazonas, Brazil	23-Negro	near confluence area Negro-Amazonas chain	NA	32020	32020
TRUE	1649	1649	UFAM	CTGA	MaterialSample	Other material	NA	Animalia	Chordata	Actinopterygii	Cichliformes	Cichlidae	Geophagus		genus	sp 3	NA	NA	-38193	-52612814	Brazil	NA	Iriri	NA	Iriri- Pará, Brazil	6-Lower Xingu	near confluence Iriri-Xingu	NA	1649	1649
TRUE	1650	1650	UFAM	CTGA	MaterialSample	Other material	NA	Animalia	Chordata	Actinopterygii	Cichliformes	Cichlidae	Geophagus		genus	sp 3	NA	NA	-38193	-52612814	Brazil	NA	Iriri	NA	Iriri- Pará, Brazil	6-Lower Xingu	near confluence Iriri-Xingu	NA	1650	1650
TRUE	1651	1651	UFAM	CTGA	MaterialSample	Other material	NA	Animalia	Chordata	Actinopterygii	Cichliformes	Cichlidae	Geophagus		genus	sp 3	NA	NA	-38193	-52612814	Brazil	NA	Iriri	NA	Iriri- Pará, Brazil	6-Lower Xingu	near confluence Iriri-Xingu	NA	1651	1651
TRUE	1652	1652	UFAM	CTGA	MaterialSample	Other material	NA	Animalia	Chordata	Actinopterygii	Cichliformes	Cichlidae	Geophagus		genus	sp 3	NA	NA	-38193	-52612814	Brazil	NA	Iriri	NA	Iriri- Pará, Brazil	6-Lower Xingu	near confluence Iriri-Xingu	NA	1652	1652
TRUE	1653	1653	UFAM	CTGA	MaterialSample	Other material	NA	Animalia	Chordata	Actinopterygii	Cichliformes	Cichlidae	Geophagus		genus	sp 3	NA	NA	-38193	-52612814	Brazil	NA	Iriri	NA	Iriri- Pará, Brazil	6-Lower Xingu	near confluence Iriri-Xingu	NA	1653	1653
TRUE	1654	1654	UFAM	CTGA	MaterialSample	Other material	NA	Animalia	Chordata	Actinopterygii	Cichliformes	Cichlidae	Geophagus		genus	sp 3	NA	NA	-38193	-52612814	Brazil	NA	Iriri	NA	Iriri- Pará, Brazil	6-Lower Xingu	near confluence Iriri-Xingu	NA	1654	1654
TRUE	1655	1655	UFAM	CTGA	MaterialSample	Other material	NA	Animalia	Chordata	Actinopterygii	Cichliformes	Cichlidae	Geophagus		genus	sp 3	NA	NA	-38193	-52612814	Brazil	NA	Iriri	NA	Iriri- Pará, Brazil	6-Lower Xingu	near confluence Iriri-Xingu	NA	1655	1655
TRUE	1656	1656	UFAM	CTGA	MaterialSample	Other material	NA	Animalia	Chordata	Actinopterygii	Cichliformes	Cichlidae	Geophagus		genus	sp 3	NA	NA	-38193	-52612814	Brazil	NA	Iriri	NA	Iriri- Pará, Brazil	6-Lower Xingu	near confluence Iriri-Xingu	NA	1656	1656
TRUE	1657	1657	UFAM	CTGA	MaterialSample	Other material	Geophagus argyrostictus	Animalia	Chordata	Actinopterygii	Cichliformes	Cichlidae	Geophagus	argyrostictus	species	NA	NA	NA	-38193	-52612814	Brazil	NA	Iriri	NA	Iriri- Pará, Brazil	6-Lower Xingu	near confluence Iriri-Xingu	NA	1657	1657
TRUE	1756	1756	UFAM	CTGA	MaterialSample	Other material	Geophagus argyrostictus	Animalia	Chordata	Actinopterygii	Cichliformes	Cichlidae	Geophagus	argyrostictus	species	NA	NA	NA	-3842072	-52751328	Brazil	NA	Iriri	NA	Iriri- Pará, Brazil	6-Lower Xingu	near confluence Iriri-Xingu	NA	1756	1756
TRUE	1758	1758	UFAM	CTGA	MaterialSample	Other material	Geophagus argyrostictus	Animalia	Chordata	Actinopterygii	Cichliformes	Cichlidae	Geophagus	argyrostictus	species	NA	NA	NA	-3842072	-52751328	Brazil	NA	Iriri	NA	Iriri- Pará, Brazil	6-Lower Xingu	near confluence Iriri-Xingu	NA	1758	1758
TRUE	1760	1760	UFAM	CTGA	MaterialSample	Other material	Geophagus argyrostictus	Animalia	Chordata	Actinopterygii	Cichliformes	Cichlidae	Geophagus	argyrostictus	species	NA	NA	NA	-3842072	-52751328	Brazil	NA	Iriri	NA	Iriri- Pará, Brazil	6-Lower Xingu	near confluence Iriri-Xingu	NA	1760	1760
TRUE	1764	1764	UFAM	CTGA	MaterialSample	Other material	NA	Animalia	Chordata	Actinopterygii	Cichliformes	Cichlidae	Geophagus		genus	sp 3	NA	NA	-3842072	-52751328	Brazil	NA	Iriri	NA	Iriri- Pará, Brazil	6-Lower Xingu	near confluence Iriri-Xingu	NA	1764	1764
TRUE	1767	1767	UFAM	CTGA	MaterialSample	Other material	NA	Animalia	Chordata	Actinopterygii	Cichliformes	Cichlidae	Geophagus		genus	sp 3	NA	NA	-3842072	-52751328	Brazil	NA	Iriri	NA	Iriri- Pará, Brazil	6-Lower Xingu	near confluence Iriri-Xingu	NA	1767	1767
TRUE	1837	1837	UFAM	CTGA	MaterialSample	Other material	Geophagus argyrostictus	Animalia	Chordata	Actinopterygii	Cichliformes	Cichlidae	Geophagus	argyrostictus	species	NA	NA	NA	-3943908	-53019256	Brazil	NA	Iriri	NA	Iriri- Pará, Brazil	5-Iriri	Lower Iriri River	NA	1837	1837
TRUE	1858	1858	UFAM	CTGA	MaterialSample	Other material	Geophagus argyrostictus	Animalia	Chordata	Actinopterygii	Cichliformes	Cichlidae	Geophagus	argyrostictus	species	NA	NA	NA	-3943908	-53019256	Brazil	NA	Iriri	NA	Iriri- Pará, Brazil	5-Iriri	Lower Iriri River	NA	1858	1858
TRUE	1905	1905	UFAM	CTGA	MaterialSample	Other material	Geophagus argyrostictus	Animalia	Chordata	Actinopterygii	Cichliformes	Cichlidae	Geophagus	argyrostictus	species	NA	NA	NA	-3852711	-52879078	Brazil	NA	Iriri	NA	Iriri- Pará, Brazil	5-Iriri	Lower Iriri River	NA	1905	1905
TRUE	1908	1908	UFAM	CTGA	MaterialSample	Other material	Geophagus argyrostictus	Animalia	Chordata	Actinopterygii	Cichliformes	Cichlidae	Geophagus	argyrostictus	species	NA	NA	NA	-3852711	-52879078	Brazil	NA	Iriri	NA	Iriri- Pará, Brazil	5-Iriri	Lower Iriri River	NA	1908	1908
TRUE	1909	1909	UFAM	CTGA	MaterialSample	Other material	Geophagus argyrostictus	Animalia	Chordata	Actinopterygii	Cichliformes	Cichlidae	Geophagus	argyrostictus	species	NA	NA	NA	-3852711	-52879078	Brazil	NA	Iriri	NA	Iriri- Pará, Brazil	5-Iriri	Lower Iriri River	NA	1909	1909
TRUE	2029	2029	UFAM	CTGA	MaterialSample	Other material	Geophagus argyrostictus	Animalia	Chordata	Actinopterygii	Cichliformes	Cichlidae	Geophagus	argyrostictus	species	NA	NA	NA	-3868097	-52896144	Brazil	NA	Iriri	NA	Iriri- Pará, Brazil	5-Iriri	Lower Iriri River	NA	2029	2029
TRUE	2040	2040	UFAM	CTGA	MaterialSample	Other material	NA	Animalia	Chordata	Actinopterygii	Cichliformes	Cichlidae	Geophagus		genus	sp 3	NA	NA	-3868097	-52896144	Brazil	NA	Iriri	NA	Iriri- Pará, Brazil	5-Iriri	Lower Iriri River	NA	2040	2040
TRUE	2041	2041	UFAM	CTGA	MaterialSample	Other material	NA	Animalia	Chordata	Actinopterygii	Cichliformes	Cichlidae	Geophagus		genus	sp 3	NA	NA	-3868097	-52896144	Brazil	NA	Iriri	NA	Iriri- Pará, Brazil	5-Iriri	Lower Iriri River	NA	2041	2041
TRUE	2042	2042	UFAM	CTGA	MaterialSample	Other material	NA	Animalia	Chordata	Actinopterygii	Cichliformes	Cichlidae	Geophagus		genus	sp 3	NA	NA	-3868097	-52896144	Brazil	NA	Iriri	NA	Iriri- Pará, Brazil	5-Iriri	Lower Iriri River	NA	2042	2042
TRUE	2043	2043	UFAM	CTGA	MaterialSample	Other material	Geophagus argyrostictus	Animalia	Chordata	Actinopterygii	Cichliformes	Cichlidae	Geophagus	argyrostictus	species	NA	NA	NA	-3868097	-52896144	Brazil	NA	Iriri	NA	Iriri- Pará, Brazil	5-Iriri	Lower Iriri River	NA	2043	2043
TRUE	2052	2052	UFAM	CTGA	MaterialSample	Other material	Geophagus argyrostictus	Animalia	Chordata	Actinopterygii	Cichliformes	Cichlidae	Geophagus	argyrostictus	species	NA	NA	NA	-3868097	-52896144	Brazil	NA	Iriri	NA	Iriri- Pará, Brazil	5-Iriri	Lower Iriri River	NA	2052	2052
TRUE	11060	11060	UFAM	CTGA	MaterialSample	Other material	Geophagus argyrostictus	Animalia	Chordata	Actinopterygii	Cichliformes	Cichlidae	Geophagus	argyrostictus	species	NA	NA	NA	-3823611	-52678611	Brazil	NA	Iriri	NA	Iriri-Xingu- Pará, Brazil	6-Lower Xingu	near confluence Iriri with Xingu	NA	11060	11060
TRUE	23158	23158	INPA	ICT	MaterialSample	Other material	NA	Animalia	Chordata	Actinopterygii	Cichliformes	Cichlidae	Geophagus		genus	sp 3	NA	NA	-3823611	-52678611	Brazil	NA	Iriri	NA	Iriri-Xingu- Pará, Brazil	6-Lower Xingu	near confluence Iriri with Xingu	NA	23158	23158
TRUE	25787	25787	INPA	ICT	MaterialSample	Other material	NA	Animalia	Chordata	Actinopterygii	Cichliformes	Cichlidae	Geophagus		genus	sp 3	field identifed as Geophagus altifrons	NA	-3824167	-52677222	Brazil	NA	Iriri	2014-11-02	Iriri-Xingu- Pará, Brazil	6-Lower Xingu	near confluence Iriri with Xingu	NA	25787	25787
TRUE	16651	16651	UFAM	CTGA	MaterialSample	Other material	Geophagus proximus	Animalia	Chordata	Actinopterygii	Cichliformes	Cichlidae	Geophagus	proximus	species	NA	NA	Ximenes, AM & Machado, VN	-3390289	-60309525	Brazil	NA	Janauacá	2017-04-01	Lago do Janauacá- Amazonas, Brazil	28-Amazonas main channel	Janauaca Lake	Izeni Pires	16651	16651
TRUE	16655	16655	UFAM	CTGA	MaterialSample	Other material	Geophagus proximus	Animalia	Chordata	Actinopterygii	Cichliformes	Cichlidae	Geophagus	proximus	species	NA	NA	Ximenes, AM & Machado, VN	-3390289	-60309525	Brazil	NA	Janauacá	2017-04-01	Lago do Janauacá- Amazonas, Brazil	28-Amazonas main channel	Janauaca Lake	Izeni Pires	16655	16655
TRUE	16656	16656	UFAM	CTGA	MaterialSample	Other material	Geophagus proximus	Animalia	Chordata	Actinopterygii	Cichliformes	Cichlidae	Geophagus	proximus	species	NA	NA	Ximenes, AM & Machado, VN	-3390289	-60309525	Brazil	NA	Janauacá	2017-04-01	Lago do Janauacá- Amazonas, Brazil	28-Amazonas main channel	Janauaca Lake	Izeni Pires	16656	16656
TRUE	16657	16657	UFAM	CTGA	MaterialSample	Other material	Geophagus proximus	Animalia	Chordata	Actinopterygii	Cichliformes	Cichlidae	Geophagus	proximus	species	NA	NA	Ximenes, AM & Machado, VN	-3390289	-60309525	Brazil	NA	Janauacá	2017-04-01	Lago do Janauacá- Amazonas, Brazil	28-Amazonas main channel	Janauaca Lake	Izeni Pires	16657	16657
TRUE	16658	16658	UFAM	CTGA	MaterialSample	Other material	Geophagus proximus	Animalia	Chordata	Actinopterygii	Cichliformes	Cichlidae	Geophagus	proximus	species	NA	NA	Ximenes, AM & Machado, VN	-3390289	-60309525	Brazil	NA	Janauacá	2017-04-01	Lago do Janauacá- Amazonas, Brazil	28-Amazonas main channel	Janauaca Lake	Izeni Pires	16658	16658
TRUE	107119	107119	UFAM/INPA	SISBIOTA	MaterialSample	Other material	NA	Animalia	Chordata	Actinopterygii	Cichliformes	Cichlidae	Geophagus		genus	sp 1	field identified as Geophagus abalios	Collins, R.; , Marcos	-1651667	-69206667	Brazil	NA	Japurá	2014-09-13	Japurá - Amazonas, Brazil	22-Japurá	Middle-Lower Japura River	Collins, R.; , Marcos	107119	107119
TRUE	107121	107121	UFAM/INPA	SISBIOTA	MaterialSample	Other material	Geophagus altifrons	Animalia	Chordata	Actinopterygii	Cichliformes	Cichlidae	Geophagus	altifrons	species	NA	field identified as Geophagus aff altifrons	Collins, R.; , Marcos	-1651667	-69206667	Brazil	NA	Japurá	2014-09-13	Japurá - Amazonas, Brazil	22-Japurá	Middle-Lower Japura River	Collins, R.; , Marcos	107121	107121
TRUE	2165	2165	UFAM	CTGA	MaterialSample	Other material	Geophagus altifrons	Animalia	Chordata	Actinopterygii	Cichliformes	Cichlidae	Geophagus	altifrons	species	NA	field identified as Geophagus aff altifrons	Stuart	-549908	-52580592	Brazil	NA	Jari	NA	Jari- Iratapuru-Pará, Brazil	27-Jari	Lower Jari River	Stuart	2165	2165
TRUE	2166	2166	UFAM	CTGA	MaterialSample	Other material	Geophagus altifrons	Animalia	Chordata	Actinopterygii	Cichliformes	Cichlidae	Geophagus	altifrons	species	NA	field identified as Geophagus aff altifrons	Stuart	-549908	-52580592	Brazil	NA	Jari	NA	Jari- Iratapuru-Pará, Brazil	27-Jari	Lower Jari River	Stuart	2166	2166
TRUE	2167	2167	UFAM	CTGA	MaterialSample	Other material	Geophagus altifrons	Animalia	Chordata	Actinopterygii	Cichliformes	Cichlidae	Geophagus	altifrons	species	NA	field identified as Geophagus aff altifrons	Stuart	-549908	-52580592	Brazil	NA	Jari	NA	Jari- Iratapuru-Pará, Brazil	27-Jari	Lower Jari River	Stuart	2167	2167
TRUE	2169	2169	UFAM	CTGA	MaterialSample	Other material	Geophagus altifrons	Animalia	Chordata	Actinopterygii	Cichliformes	Cichlidae	Geophagus	altifrons	species	NA	field identified as Geophagus aff altifrons	Stuart	-549908	-52580592	Brazil	NA	Jari	NA	Jari- Iratapuru-Pará, Brazil	27-Jari	Lower Jari River	Stuart	2169	2169
TRUE	2159	2159	UFAM	CTGA	MaterialSample	Other material	Geophagus altifrons	Animalia	Chordata	Actinopterygii	Cichliformes	Cichlidae	Geophagus	altifrons	species	NA	field identified as Geophagus aff altifrons	Stuart	-549908	-52580592	Brazil	NA	Jari	NA	Jari- Iratapuru-Pará, Brazil	27-Jari	Lower Jari River	Stuart	2159	2159
TRUE	100445	100445	UFAM/INPA	SISBIOTA	MaterialSample	Other material	Geophagus altifrons	Animalia	Chordata	Actinopterygii	Cichliformes	Cichlidae	Geophagus	altifrons	species	NA	NA	L. Rapp Py-Daniel, et al.	-2172536	-58136367	Brazil	NA	Jatapu	2011-09-28	São Sebastião do Uatumã- Amazonas, Brazil	25-Urubu-Uatumã	Macarana Lake- Jatapu River	NA	100445	100445
TRUE	229	229	UNIR	GEN	MaterialSample	Other material	Geophagus megasema	Animalia	Chordata	Actinopterygii	Cichliformes	Cichlidae	Geophagus	megasema	species	NA	NA	Doria, C	-9454833	-64403861	Brazil	NA	Jaci Paraná	NA	Jaci Paraná -Rondônia, Brazil	14-Middle-Lower Madeira	Lower Jaci Paraná River	NA	229	229
TRUE	230	230	UNIR	GEN	MaterialSample	Other material	Geophagus megasema	Animalia	Chordata	Actinopterygii	Cichliformes	Cichlidae	Geophagus	megasema	species	NA	field identified as Geophagus proximus	Doria, C	-9454833	-64403861	Brazil	NA	Jaci Paraná	NA	Jaci Paraná -Rondônia, Brazil	14-Middle-Lower Madeira	Lower Jaci Paraná River	NA	230	230
TRUE	233	233	UNIR	GEN	MaterialSample	Other material	Geophagus megasema	Animalia	Chordata	Actinopterygii	Cichliformes	Cichlidae	Geophagus	megasema	species	NA	NA	Doria, C	-9454833	-64403861	Brazil	NA	Jaci Paraná	NA	Jaci Paraná -Rondônia, Brazil	14-Middle-Lower Madeira	Lower Jaci Paraná River	NA	233	233
TRUE	232	232	UNIR	GEN	MaterialSample	Other material	Geophagus megasema	Animalia	Chordata	Actinopterygii	Cichliformes	Cichlidae	Geophagus	megasema	species	NA	NA	Doria, C	-9454833	-64403861	Brazil	NA	Jaci Paraná	NA	Jaci Paraná -Rondônia, Brazil	14-Middle-Lower Madeira	Lower Jaci Paraná River	NA	232	232
TRUE	234	234	UNIR	GEN	MaterialSample	Other material	Geophagus megasema	Animalia	Chordata	Actinopterygii	Cichliformes	Cichlidae	Geophagus	megasema	species	NA	NA	Doria, C	-9454833	-64403861	Brazil	NA	Jaci Paraná	NA	Jaci Paraná -Rondônia, Brazil	14-Middle-Lower Madeira	Lower Jaci Paraná River	NA	234	234
TRUE	239	239	UNIR	GEN	MaterialSample	Other material	Geophagus megasema	Animalia	Chordata	Actinopterygii	Cichliformes	Cichlidae	Geophagus	megasema	species	NA	NA	Doria, C	-9454833	-64403861	Brazil	NA	Jaci Paraná	NA	Jaci Paraná -Rondônia, Brazil	14-Middle-Lower Madeira	Lower Jaci Paraná River	NA	239	239
TRUE	15355	15355	UFAM	CTGA	MaterialSample	Other material	NA	Animalia	Chordata	Actinopterygii	Cichliformes	Cichlidae	Geophagus		genus	sp 1	field identified as Geophagus sp	Machado, VN	-3697828	-59838428	Brazil	NA	Juma	NA	Interfluvio Purus Madeira Juma- Amazonas, Brazil	14-Middle-Lower Madeira	Juma Lake	Valéria Machado	15355	15355
TRUE	15353	15353	UFAM	CTGA	MaterialSample	Other material	NA	Animalia	Chordata	Actinopterygii	Cichliformes	Cichlidae	Geophagus		genus	sp 1	field identified as Geophagus sp	Machado, VN	-3697828	-59838428	Brazil	NA	Juma	NA	Interfluvio Purus Madeira Juma- Amazonas, Brazil	14-Middle-Lower Madeira	Juma Lake	Valéria Machado	15353	15353
TRUE	15354	15354	UFAM	CTGA	MaterialSample	Other material	NA	Animalia	Chordata	Actinopterygii	Cichliformes	Cichlidae	Geophagus		genus	sp 1	field identified as Geophagus sp	Machado, VN	-3697828	-59838428	Brazil	NA	Juma	NA	Interfluvio Purus Madeira Juma- Amazonas, Brazil	14-Middle-Lower Madeira	Juma Lake	Valéria Machado	15354	15354
TRUE	16829	16829	UFAM	CTGA	MaterialSample	Other material	Geophagus proximus	Animalia	Chordata	Actinopterygii	Cichliformes	Cichlidae	Geophagus	proximus	species	NA	NA	Machado, VN	-5047086	-66836442	Brazil	NA	Jurua	2017-09-01	Carauari- Amazonas, Brazil	17-Juruá	Middle Lower Jurua River	José Antônio, Aline Ximenes, Valéria Machado	16829	16829
TRUE	7040	7040	UNIR	GEN	MaterialSample	Other material	Geophagus megasema	Animalia	Chordata	Actinopterygii	Cichliformes	Cichlidae	Geophagus	megasema	species	NA	NA	Doria, C	-8076778	-62888806	Brazil	NA	Machado	NA	Machado- Calama-Rondônia, Brazil	15-Madeira Shield Tributaries	Machado near confluence with Middle Madeira	NA	7040	7040
TRUE	7033	7033	UNIR	GEN	MaterialSample	Other material	NA	Animalia	Chordata	Actinopterygii	Cichliformes	Cichlidae	Geophagus		genus	sp 5	NA	NA	-8083083	-62876194	Brazil	NA	Machado	NA	Machado- Calama-Rondônia, Brazil	15-Madeira Shield Tributaries	Machado near confluence with Middle Madeira	NA	7033	7033
TRUE	7032	7032	UNIR	GEN	MaterialSample	Other material	Geophagus megasema	Animalia	Chordata	Actinopterygii	Cichliformes	Cichlidae	Geophagus	megasema	species	NA	NA	Doria, C	-8083083	-62876194	Brazil	NA	Machado	NA	Machado- Calama-Rondônia, Brazil	15-Madeira Shield Tributaries	Machado near confluence with Middle Madeira	NA	7032	7032
TRUE	17640	17640	UFAM	CTGA	MaterialSample	Other material	Geophagus megasema	Animalia	Chordata	Actinopterygii	Cichliformes	Cichlidae	Geophagus	megasema	species	NA	NA	NA	-3403719	-64813118	Brazil	NA	Mamirauá	NA	Mamirauá- Amazonas, Brazil	28-Amazonas main channel	Lake Tefé	NA	17640	17640
TRUE	17641	17641	UFAM	CTGA	MaterialSample	Other material	Geophagus megasema	Animalia	Chordata	Actinopterygii	Cichliformes	Cichlidae	Geophagus	megasema	species	NA	NA	NA	-340372	-64813119	Brazil	NA	Mamirauá	NA	Mamirauá- Amazonas, Brazil	28-Amazonas main channel	Lake Tefé	NA	17641	17641
TRUE	17643	17643	UFAM	CTGA	MaterialSample	Other material	Geophagus megasema	Animalia	Chordata	Actinopterygii	Cichliformes	Cichlidae	Geophagus	megasema	species	NA	NA	NA	-3403721	-6481312	Brazil	NA	Mamirauá	NA	Mamirauá- Amazonas, Brazil	28-Amazonas main channel	Lake Tefé	NA	17643	17643
TRUE	17644	17644	UFAM	CTGA	MaterialSample	Other material	Geophagus megasema	Animalia	Chordata	Actinopterygii	Cichliformes	Cichlidae	Geophagus	megasema	species	NA	NA	NA	-3403722	-64813121	Brazil	NA	Mamirauá	NA	Mamirauá- Amazonas, Brazil	28-Amazonas main channel	Lake Tefé	NA	17644	17644
TRUE	17645	17645	UFAM	CTGA	MaterialSample	Other material	Geophagus megasema	Animalia	Chordata	Actinopterygii	Cichliformes	Cichlidae	Geophagus	megasema	species	NA	NA	NA	-3403723	-64813122	Brazil	NA	Mamirauá	NA	Mamirauá- Amazonas, Brazil	28-Amazonas main channel	Lake Tefé	NA	17645	17645
TRUE	299	299	UNIR	GEN	MaterialSample	Other material	Geophagus megasema	Animalia	Chordata	Actinopterygii	Cichliformes	Cichlidae	Geophagus	megasema	species	NA	NA	Doria, C	-10821233	-6532885	Brazil	NA	Mamoré	NA	Mamoré- Rondônia, Brazil	11-Mamoré	Lower Mamoré River	NA	299	299
TRUE	300	300	UNIR	GEN	MaterialSample	Other material	Geophagus megasema	Animalia	Chordata	Actinopterygii	Cichliformes	Cichlidae	Geophagus	megasema	species	NA	NA	Doria, C	-10821233	-6532885	Brazil	NA	Mamoré	NA	Mamoré- Rondônia, Brazil	11-Mamoré	Lower Mamoré River	NA	300	300
TRUE	298	298	UNIR	GEN	MaterialSample	Other material	Geophagus megasema	Animalia	Chordata	Actinopterygii	Cichliformes	Cichlidae	Geophagus	megasema	species	NA	NA	Doria, C	-10821233	-6532885	Brazil	NA	Mamoré	NA	Mamoré- Rondônia, Brazil	11-Mamoré	Lower Mamoré River	NA	298	298
TRUE	16814	16814	UFAM	CTGA	MaterialSample	Other material	Geophagus altifrons	Animalia	Chordata	Actinopterygii	Cichliformes	Cichlidae	Geophagus	altifrons	species	NA	NA	NA	-3211747	-60756853	Brazil	NA	Manacapuru	2012	Manacapuru- Amazonas, Brazil	28-Amazonas main channel	Manacapuru Lake	Júlia Tovar	16814	16814
TRUE	16815	16815	UFAM	CTGA	MaterialSample	Other material	Geophagus altifrons	Animalia	Chordata	Actinopterygii	Cichliformes	Cichlidae	Geophagus	altifrons	species	NA	identified as Geophagus cf. altifrons	NA	-3211747	-60756853	Brazil	NA	Manacapuru	2012	Manacapuru- Amazonas, Brazil	28-Amazonas main channel	Manacapuru Lake	Júlia Tovar	16815	16815
TRUE	16823	16823	UFAM	CTGA	MaterialSample	Other material	Geophagus altifrons	Animalia	Chordata	Actinopterygii	Cichliformes	Cichlidae	Geophagus	altifrons	species	NA	NA	NA	-3211747	-60756853	Brazil	NA	Manacapuru	2012	Manacapuru- Amazonas, Brazil	28-Amazonas main channel	Manacapuru Lake	Júlia Tovar	16823	16823
TRUE	9414	9414	UNIR	GEN	MaterialSample	Other material	Geophagus megasema	Animalia	Chordata	Actinopterygii	Cichliformes	Cichlidae	Geophagus	megasema	species	NA	NA	Doria, C	-10821233	-6532885	Brazil	NA	Mamoré	NA	Mamoré- Rondônia, Brazil	11-Mamoré	Lower Mamoré River	NA	9414	9414
TRUE	17581	17581	UFAM	CTGA	MaterialSample	Other material	Geophagus altifrons	Animalia	Chordata	Actinopterygii	Cichliformes	Cichlidae	Geophagus	altifrons	species	NA	NA	Ximenes, AM & Machado, VN	-34491	-57735325	Brazil	NA	Maués-Açu	2019-05-01	Maués-Açu- Amazonas, Brazil	14-Middle-Lower Madeira	Maués-Açu lake	Aline Ximenes	17581	17581
TRUE	12378	12378	UFAM	CTGA	MaterialSample	Other material	Geophagus winemilleri	Animalia	Chordata	Actinopterygii	Cichliformes	Cichlidae	Geophagus	winemilleri	species	NA	field identified as Geophagus sp	Ferreira, E & Zuanon, J	507869	-67301183	Brazil	NA	Negro	NA	São Gabriel da Cachoeira- Amazonas, Brazil	23-Negro	Upper Negro River	Aline Ximenes & Sarah Ventura	12378	12378
TRUE	15674	15674	UFAM	CTGA	MaterialSample	Other material	NA	Animalia	Chordata	Actinopterygii	Cichliformes	Cichlidae	Geophagus		genus	sp 1	field identified as Geophagus sp	Ferreira, E & Zuanon, J	-942103	-62929917	Brazil	NA	Negro	2016-02-01	Barcelos- Amazonas, Brazil	23-Negro	Middle Negro River	Aline Ximenes & Sarah Ventura	15674	15674
TRUE	15675	15675	UFAM	CTGA	MaterialSample	Other material	Geophagus winemilleri	Animalia	Chordata	Actinopterygii	Cichliformes	Cichlidae	Geophagus	winemilleri	species	NA	field identified as Geophagus sp	Ferreira, E & Zuanon, J	-942103	-62929917	Brazil	NA	Negro	2016-02-01	Barcelos- Amazonas, Brazil	23-Negro	Middle Negro River	Aline Ximenes & Sarah Ventura	15675	15675
TRUE	15676	15676	UFAM	CTGA	MaterialSample	Other material	Geophagus winemilleri	Animalia	Chordata	Actinopterygii	Cichliformes	Cichlidae	Geophagus	winemilleri	species	NA	field identified as Geophagus proximus	Ferreira, E & Zuanon, J	-942103	-62929917	Brazil	NA	Negro	2016-02-01	Barcelos- Amazonas, Brazil	23-Negro	Middle Negro River	Aline Ximenes & Sarah Ventura	15676	15676
TRUE	29627	29627	INPA	ICT	MaterialSample	Other material	Geophagus winemilleri	Animalia	Chordata	Actinopterygii	Cichliformes	Cichlidae	Geophagus	winemilleri	species	NA	NA	Ferreira, E & Zuanon, J	-137344	-67083906	Brazil	NA	Negro	2016-02-01	São Gabriel da Cachoeira- Amazonas, Brazil	23-Negro	Upper Negro River	Aline Ximenes & Sarah Ventura	29627	29627
TRUE	356	356	UFAM	CTGA	MaterialSample	Other material	Geophagus proximus	Animalia	Chordata	Actinopterygii	Cichliformes	Cichlidae	Geophagus	proximus	species	NA	NA	Collins, Ribeiro & Machado	-1832844	-57073811	Brazil	NA	Nhamundá	NA	Nhamundá- Amazonas, Brazil	26-Trombetas	Lower Nhamundá River	Valéria Machado	356	356
TRUE	357	357	UFAM	CTGA	MaterialSample	Other material	Geophagus altifrons	Animalia	Chordata	Actinopterygii	Cichliformes	Cichlidae	Geophagus	altifrons	species	NA	NA	Collins, Ribeiro & Machado	-1832844	-57073811	Brazil	NA	Nhamundá	NA	Nhamundá- Amazonas, Brazil	26-Trombetas	Lower Nhamundá River	Valéria Machado	357	357
TRUE	14284	14284	UFAM	CTGA	MaterialSample	Other material	Geophagus altifrons	Animalia	Chordata	Actinopterygii	Cichliformes	Cichlidae	Geophagus	altifrons	species	NA	NA	Collins, Ribeiro & Machado	-1832844	-57073811	Brazil	NA	Nhamundá	NA	Nhamundá- Amazonas, Brazil	26-Trombetas	Lower Nhamundá River	Valéria Machado	14284	14284
TRUE	14285	14285	UFAM	CTGA	MaterialSample	Other material	Geophagus altifrons	Animalia	Chordata	Actinopterygii	Cichliformes	Cichlidae	Geophagus	altifrons	species	NA	NA	Collins, Ribeiro & Machado	-1832844	-57073811	Brazil	NA	Nhamundá	NA	Nhamundá- Amazonas, Brazil	26-Trombetas	Lower Nhamundá River	Valéria Machado	14285	14285
TRUE	14439	14439	UFAM	CTGA	MaterialSample	Other material	Geophagus altifrons	Animalia	Chordata	Actinopterygii	Cichliformes	Cichlidae	Geophagus	altifrons	species	NA	NA	Collins, Ribeiro & Machado	-1832844	-57073811	Brazil	NA	Nhamundá	NA	Nhamundá- Amazonas, Brazil	26-Trombetas	Lower Nhamundá River	Valéria Machado	14439	14439
TRUE	14456	14456	UFAM	CTGA	MaterialSample	Other material	Geophagus altifrons	Animalia	Chordata	Actinopterygii	Cichliformes	Cichlidae	Geophagus	altifrons	species	NA	NA	Collins, Ribeiro & Machado	-1832844	-57073811	Brazil	NA	Nhamundá	NA	Nhamundá- Amazonas, Brazil	26-Trombetas	Lower Nhamundá River	Valéria Machado	14456	14456
TRUE	14455	14455	UFAM	CTGA	MaterialSample	Other material	Geophagus altifrons	Animalia	Chordata	Actinopterygii	Cichliformes	Cichlidae	Geophagus	altifrons	species	NA	NA	Collins, Ribeiro & Machado	-1832844	-57073811	Brazil	NA	Nhamundá	NA	Nhamundá- Amazonas, Brazil	26-Trombetas	Lower Nhamundá River	Valéria Machado	14455	14455
TRUE	1192	1192	UFAM	CTGA	MaterialSample	Other material	Geophagus altifrons	Animalia	Chordata	Actinopterygii	Cichliformes	Cichlidae	Geophagus	altifrons	species	NA	NA	Machado, VN & Galetti	-1501489	-52682106	Brazil	NA	Paru	NA	Paru- Pará, Brazil	26-Trombetas	Lower Paru- confluence with Lower Amazonas	Valéria &Elizabeth	1192	1192
TRUE	1194	1194	UFAM	CTGA	MaterialSample	Other material	Geophagus altifrons	Animalia	Chordata	Actinopterygii	Cichliformes	Cichlidae	Geophagus	altifrons	species	NA	NA	Machado, VN & Galetti	-1501489	-52682106	Brazil	NA	Paru	NA	Paru- Pará, Brazil	26-Trombetas	Lower Paru- confluence with Lower Amazonas	Valéria &Elizabeth	1194	1194
TRUE	1195	1195	UFAM	CTGA	MaterialSample	Other material	Geophagus altifrons	Animalia	Chordata	Actinopterygii	Cichliformes	Cichlidae	Geophagus	altifrons	species	NA	NA	Machado, VN & Galetti	-1501489	-52682106	Brazil	NA	Paru	NA	Paru- Pará, Brazil	26-Trombetas	Lower Paru- confluence with Lower Amazonas	Valéria &Elizabeth	1195	1195
TRUE	1196	1196	UFAM	CTGA	MaterialSample	Other material	Geophagus altifrons	Animalia	Chordata	Actinopterygii	Cichliformes	Cichlidae	Geophagus	altifrons	species	NA	NA	Machado, VN & Galetti	-1501489	-52682106	Brazil	NA	Paru	NA	Paru- Pará, Brazil	26-Trombetas	Lower Paru- confluence with Lower Amazonas	Valéria &Elizabeth	1196	1196
TRUE	1191	1191	UFAM	CTGA	MaterialSample	Other material	Geophagus altifrons	Animalia	Chordata	Actinopterygii	Cichliformes	Cichlidae	Geophagus	altifrons	species	NA	field identified as Geophagus cf altifrons	Machado, VN & Galetti	-1501489	-52682106	Brazil	NA	Paru	NA	Paru- Pará, Brazil	26-Trombetas	Lower Paru- confluence with Lower Amazonas	Valéria &Elizabeth	1191	1191
TRUE	17633	17633	UFAM	CTGA	MaterialSample	Other material	NA	Animalia	Chordata	Actinopterygii	Cichliformes	Cichlidae	Geophagus		genus	sp 2	NA	Ximenes, AM	-8734356	-67405686	Brazil	NA	Purus	NA	Purus- Boca do Acre- Amazonas, Brazil	16-Purus	Upper Purus- confluence Boca do Acre River	NA	17633	17633
TRUE	17634	17634	UFAM	CTGA	MaterialSample	Other material	NA	Animalia	Chordata	Actinopterygii	Cichliformes	Cichlidae	Geophagus		genus	sp 2	NA	Ximenes, AM	-8734356	-67405686	Brazil	NA	Purus	NA	Purus- Boca do Acre- Amazonas, Brazil	16-Purus	Upper Purus- confluence Boca do Acre River	NA	17634	17634
TRUE	17657	17657	UFAM	CTGA	MaterialSample	Other material	NA	Animalia	Chordata	Actinopterygii	Cichliformes	Cichlidae	Geophagus	proximus	species	NA	field identified as Geophagus cf proximus	NA	-8734356	-67405686	Brazil	NA	Purus	NA	Purus- Boca do Acre- Amazonas, Brazil	16-Purus	Upper Purus- confluence Boca do Acre River	NA	17657	17657
TRUE	102687	102687	UFAM	CTGA	MaterialSample	Other material	Geophagus proximus	Animalia	Chordata	Actinopterygii	Cichliformes	Cichlidae	Geophagus	proximus	species	NA	field identified as Geophagus cf proximus	NA	-5822778	-63287778	Brazil	NA	Purus	2012-08-17	Purus- foz do Tapauá- Amazonas, Brazil	16-Purus	Middle Lower Purus	NA	102687	102687
TRUE	16643	16643	UFAM	CTGA	MaterialSample	Other material	NA	Animalia	Chordata	Actinopterygii	Cichliformes	Cichlidae	Geophagus		genus	sp 2	NA	NA	-7338939	-64898036	Brazil	NA	Purus	2017-10-01	Purus- Lábrea- Lago Ipuxi- Amazonas, Brazil	16-Purus	Upper Middle Purus River	Aline Ximenes e Josue	16643	16643
TRUE	16644	16644	UFAM	CTGA	MaterialSample	Other material	NA	Animalia	Chordata	Actinopterygii	Cichliformes	Cichlidae	Geophagus		genus	sp 2	NA	NA	-7338939	-64898036	Brazil	NA	Purus	2017-10-01	Purus- Lábrea- Lago Ipuxi- Amazonas, Brazil	16-Purus	Upper Middle Purus River	Aline Ximenes e Josue	16644	16644
TRUE	16645	16645	UFAM	CTGA	MaterialSample	Other material	NA	Animalia	Chordata	Actinopterygii	Cichliformes	Cichlidae	Geophagus		genus	sp 2	NA	NA	-7338939	-64898036	Brazil	NA	Purus	2017-10-01	Purus- Lábrea- Lago Ipuxi- Amazonas, Brazil	16-Purus	Upper Middle Purus River	Aline Ximenes e Josue	16645	16645
TRUE	17635	17635	UFAM	CTGA	MaterialSample	Other material	NA	Animalia	Chordata	Actinopterygii	Cichliformes	Cichlidae	Geophagus		genus	sp 2	NA	NA	-8734356	-67405686	Brazil	NA	Purus	NA	Purus- Boca do Acre- Amazonas, Brazil	16-Purus	Upper Purus- confluence Boca do Acre River	NA	17635	17635
TRUE	17636	17636	UFAM	CTGA	MaterialSample	Other material	NA	Animalia	Chordata	Actinopterygii	Cichliformes	Cichlidae	Geophagus		genus	sp 2	NA	NA	-8734356	-67405686	Brazil	NA	Purus	NA	Purus- Boca do Acre- Amazonas, Brazil	16-Purus	Upper Purus- confluence Boca do Acre River	NA	17636	17636
TRUE	17637	17637	UFAM	CTGA	MaterialSample	Other material	NA	Animalia	Chordata	Actinopterygii	Cichliformes	Cichlidae	Geophagus		genus	sp 2	NA	NA	-8734356	-67405686	Brazil	NA	Purus	NA	Purus- Boca do Acre- Amazonas, Brazil	16-Purus	Upper Purus- confluence Boca do Acre River	NA	17637	17637
TRUE	17638	17638	UFAM	CTGA	MaterialSample	Other material	NA	Animalia	Chordata	Actinopterygii	Cichliformes	Cichlidae	Geophagus		genus	sp 2	NA	NA	-8734356	-67405686	Brazil	NA	Purus	NA	Purus- Boca do Acre- Amazonas, Brazil	16-Purus	Upper Purus- confluence Boca do Acre River	NA	17638	17638
TRUE	17639	17639	UFAM	CTGA	MaterialSample	Other material	NA	Animalia	Chordata	Actinopterygii	Cichliformes	Cichlidae	Geophagus		genus	sp 2	NA	NA	-8734356	-67405686	Brazil	NA	Purus	NA	Purus- Boca do Acre- Amazonas, Brazil	16-Purus	Upper Purus- confluence Boca do Acre River	NA	17639	17639
TRUE	17656	17656	UFAM	CTGA	MaterialSample	Other material	NA	Animalia	Chordata	Actinopterygii	Cichliformes	Cichlidae	Geophagus	proximus	species	NA	field identified as Geophagus cf proximus	NA	-8734356	-67405686	Brazil	NA	Purus	NA	Purus- Boca do Acre- Amazonas, Brazil	16-Purus	Upper Purus- confluence Boca do Acre River	NA	17656	17656
TRUE	17658	17658	UFAM	CTGA	MaterialSample	Other material	NA	Animalia	Chordata	Actinopterygii	Cichliformes	Cichlidae	Geophagus	proximus	species	NA	field identified as Geophagus cf proximus	NA	-8734356	-67405686	Brazil	NA	Purus	NA	Purus- Boca do Acre- Amazonas, Brazil	16-Purus	Upper Purus- confluence Boca do Acre River	NA	17658	17658
TRUE	1186	1186	UFAM	CTGA	MaterialSample	Other material	NA	Animalia	Chordata	Actinopterygii	Cichliformes	Cichlidae	Geophagus		genus	sp 1	NA	NA	-2433153	-54765181	Brazil	NA	Tapajós	NA	Tapajós- Amazonas, Santarém- Pará, Brazil	28-Amazonas main channel	Lower Tapajós-Amazonas	NA	1186	1186
TRUE	1187	1187	UFAM	CTGA	MaterialSample	Other material	Geophagus proximus	Animalia	Chordata	Actinopterygii	Cichliformes	Cichlidae	Geophagus	proximus	species	NA	NA	NA	-2433153	-54765181	Brazil	NA	Tapajós	NA	Tapajós- Amazonas, Santarém- Pará, Brazil	28-Amazonas main channel	Lower Tapajós-Amazonas	NA	1187	1187
TRUE	1188	1188	UFAM	CTGA	MaterialSample	Other material	Geophagus proximus	Animalia	Chordata	Actinopterygii	Cichliformes	Cichlidae	Geophagus	proximus	species	NA	NA	NA	-2433153	-54765181	Brazil	NA	Tapajós	NA	Tapajós- Amazonas, Santarém- Pará, Brazil	28-Amazonas main channel	Lower Tapajós-Amazonas	NA	1188	1188
TRUE	1189	1189	UFAM	CTGA	MaterialSample	Other material	Geophagus proximus	Animalia	Chordata	Actinopterygii	Cichliformes	Cichlidae	Geophagus	proximus	species	NA	NA	NA	-2433153	-54765181	Brazil	NA	Tapajós	NA	Tapajós- Amazonas, Santarém- Pará, Brazil	28-Amazonas main channel	Lower Tapajós-Amazonas	NA	1189	1189
TRUE	1190	1190	UFAM	CTGA	MaterialSample	Other material	Geophagus proximus	Animalia	Chordata	Actinopterygii	Cichliformes	Cichlidae	Geophagus	proximus	species	NA	NA	NA	-2433153	-54765181	Brazil	NA	Tapajós	NA	Tapajós- Amazonas, Santarém- Pará, Brazil	28-Amazonas main channel	Lower Tapajós-Amazonas	NA	1190	1190
TRUE	1410	1410	UFAM	CTGA	MaterialSample	Other material	Geophagus altifrons	Animalia	Chordata	Actinopterygii	Cichliformes	Cichlidae	Geophagus	altifrons	species	NA	field identified as Geophagus cf altifrons	NA	-4304925	-56012269	Brazil	NA	Tapajós	NA	Tapajós- Itaituba- Pará, Brazil	9-Tapajós	Middle Tapajós River	NA	1410	1410
TRUE	15379	15379	UFAM	CTGA	MaterialSample	Other material	Geophagus altifrons	Animalia	Chordata	Actinopterygii	Cichliformes	Cichlidae	Geophagus	altifrons	species	NA	field identified as Geophagus cf altifrons	NA	-5011789	-567923	Brazil	NA	Tapajós	NA	Tapajós- Itaituba-Jacareacanga Pará, Brazil	9-Tapajós	Upper Middle Tapajós River	NA	15379	15379
TRUE	1409	1409	UFAM	CTGA	MaterialSample	Other material	Geophagus altifrons	Animalia	Chordata	Actinopterygii	Cichliformes	Cichlidae	Geophagus	altifrons	species	NA	field identified as Geophagus cf altifrons	NA	-4304925	-56012269	Brazil	NA	Tapajós	NA	Tapajós- Itaituba- Pará, Brazil	9-Tapajós	Middle Tapajós River	NA	1409	1409
TRUE	1411	1411	UFAM	CTGA	MaterialSample	Other material	Geophagus altifrons	Animalia	Chordata	Actinopterygii	Cichliformes	Cichlidae	Geophagus	altifrons	species	NA	fiield identified as Geophagus cf altifrons	NA	-4304925	-56012269	Brazil	NA	Tapajós	NA	Tapajós- Itaituba- Pará, Brazil	9-Tapajós	Middle Tapajós River	NA	1411	1411
TRUE	1412	1412	UFAM	CTGA	MaterialSample	Other material	Geophagus altifrons	Animalia	Chordata	Actinopterygii	Cichliformes	Cichlidae	Geophagus	altifrons	species	NA	field identified as Geophagus cf altifrons	NA	-4304925	-56012269	Brazil	NA	Tapajós	NA	Tapajós- Itaituba- Pará, Brazil	9-Tapajós	Middle Tapajós River	NA	1412	1412
TRUE	1413	1413	UFAM	CTGA	MaterialSample	Other material	Geophagus altifrons	Animalia	Chordata	Actinopterygii	Cichliformes	Cichlidae	Geophagus	altifrons	species	NA	field identified as Geophagus cf altifrons	NA	-4304925	-56012269	Brazil	NA	Tapajós	NA	Tapajós- Itaituba- Pará, Brazil	9-Tapajós	Middle Tapajós River	NA	1413	1413
TRUE	1414	1414	UFAM	CTGA	MaterialSample	Other material	Geophagus altifrons	Animalia	Chordata	Actinopterygii	Cichliformes	Cichlidae	Geophagus	altifrons	species	NA	field identified as Geophagus cf altifrons	NA	-4304925	-56012269	Brazil	NA	Tapajós	NA	Tapajós- Itaituba- Pará, Brazil	9-Tapajós	Middle Tapajós River	NA	1414	1414
TRUE	1607	1607	UFAM	CTGA	MaterialSample	Other material	Geophagus altifrons	Animalia	Chordata	Actinopterygii	Cichliformes	Cichlidae	Geophagus	altifrons	species	NA	field identified as Geophagus cf altifrons	NA	-6276008	-57739997	Brazil	NA	Tapajós	NA	Tapajós- Jacareacanga- Pará, Brazil	9-Tapajós	Upper Tapajós River	NA	1607	1607
TRUE	1608	1608	UFAM	CTGA	MaterialSample	Other material	Geophagus altifrons	Animalia	Chordata	Actinopterygii	Cichliformes	Cichlidae	Geophagus	altifrons	species	NA	field identified as Geophagus cf altifrons	NA	-6276008	-57739997	Brazil	NA	Tapajós	NA	Tapajós- Jacareacanga- Pará, Brazil	9-Tapajós	Upper Tapajós River	NA	1608	1608
TRUE	1610	1610	UFAM	CTGA	MaterialSample	Other material	Geophagus altifrons	Animalia	Chordata	Actinopterygii	Cichliformes	Cichlidae	Geophagus	altifrons	species	NA	field identified as Geophagus cf altifrons	NA	-6276008	-57739997	Brazil	NA	Tapajós	NA	Tapajós- Jacareacanga- Pará, Brazil	9-Tapajós	Upper Tapajós River	NA	1610	1610
TRUE	1611	1611	UFAM	CTGA	MaterialSample	Other material	Geophagus altifrons	Animalia	Chordata	Actinopterygii	Cichliformes	Cichlidae	Geophagus	altifrons	species	NA	field identified as Geophagus cf altifrons	NA	-6276008	-57739997	Brazil	NA	Tapajós	NA	Tapajós- Jacareacanga- Pará, Brazil	9-Tapajós	Upper Tapajós River	NA	1611	1611
TRUE	1612	1612	UFAM	CTGA	MaterialSample	Other material	Geophagus altifrons	Animalia	Chordata	Actinopterygii	Cichliformes	Cichlidae	Geophagus	altifrons	species	NA	field identified as Geophagus cf altifrons	NA	-6276008	-57739997	Brazil	NA	Tapajós	NA	Tapajós- Jacareacanga- Pará, Brazil	9-Tapajós	Upper Tapajós River	NA	1612	1612
TRUE	1613	1613	UFAM	CTGA	MaterialSample	Other material	Geophagus altifrons	Animalia	Chordata	Actinopterygii	Cichliformes	Cichlidae	Geophagus	altifrons	species	NA	field identified as Geophagus cf altifrons	NA	-6276008	-57739997	Brazil	NA	Tapajós	NA	Tapajós- Jacareacanga- Pará, Brazil	9-Tapajós	Upper Tapajós River	NA	1613	1613
TRUE	1614	1614	UFAM	CTGA	MaterialSample	Other material	Geophagus altifrons	Animalia	Chordata	Actinopterygii	Cichliformes	Cichlidae	Geophagus	altifrons	species	NA	field identified as Geophagus cf altifrons	NA	-6276008	-57739997	Brazil	NA	Tapajós	NA	Tapajós- Jacareacanga- Pará, Brazil	9-Tapajós	Upper Tapajós River	NA	1614	1614
TRUE	1615	1615	UFAM	CTGA	MaterialSample	Other material	Geophagus altifrons	Animalia	Chordata	Actinopterygii	Cichliformes	Cichlidae	Geophagus	altifrons	species	NA	field identified as Geophagus cf altifrons	NA	-6276008	-57739997	Brazil	NA	Tapajós	NA	Tapajós- Jacareacanga- Pará, Brazil	9-Tapajós	Upper Tapajós River	NA	1615	1615
TRUE	17563	17563	UFAM	CTGA	MaterialSample	Other material	Geophagus proximus	Animalia	Chordata	Actinopterygii	Cichliformes	Cichlidae	Geophagus	proximus	species	NA	NA	Ximenes, AM & Machado, VN	-3395667	-57761008	Brazil	NA	Maués-Açu	2019-05-01	Maués-Açu- Amazonas, Brazil	14-Middle-Lower Madeira	Maués-Açu lake	Aline Ximenes	17563	17563
TRUE	17565	17565	UFAM	CTGA	MaterialSample	Other material	Geophagus proximus	Animalia	Chordata	Actinopterygii	Cichliformes	Cichlidae	Geophagus	proximus	species	NA	NA	Ximenes, AM & Machado, VN	-3395667	-57761008	Brazil	NA	Maués-Açu	2019-05-01	Maués-Açu- Amazonas, Brazil	14-Middle-Lower Madeira	Maués-Açu lake	Aline Ximenes	17565	17565
TRUE	17566	17566	UFAM	CTGA	MaterialSample	Other material	Geophagus proximus	Animalia	Chordata	Actinopterygii	Cichliformes	Cichlidae	Geophagus	proximus	species	NA	NA	Ximenes, AM & Machado, VN	-34491	-57735325	Brazil	NA	Maués-Açu	2019-05-01	Maués-Açu- Amazonas, Brazil	14-Middle-Lower Madeira	Maués-Açu lake	Aline Ximenes	17566	17566
TRUE	17567	17567	UFAM	CTGA	MaterialSample	Other material	Geophagus proximus	Animalia	Chordata	Actinopterygii	Cichliformes	Cichlidae	Geophagus	proximus	species	NA	NA	Ximenes, AM & Machado, VN	-34491	-57735325	Brazil	NA	Maués-Açu	2019-05-01	Maués-Açu- Amazonas, Brazil	14-Middle-Lower Madeira	Maués-Açu lake	Aline Ximenes	17567	17567
TRUE	17570	17570	UFAM	CTGA	MaterialSample	Other material	Geophagus altifrons	Animalia	Chordata	Actinopterygii	Cichliformes	Cichlidae	Geophagus	altifrons	species	NA	NA	Ximenes, AM & Machado, VN	-3390489	-57722472	Brazil	NA	Maués-Açu	2019-05-01	Maués-Açu- Amazonas, Brazil	14-Middle-Lower Madeira	Maués-Açu lake	Aline Ximenes	17570	17570
TRUE	17571	17571	UFAM	CTGA	MaterialSample	Other material	Geophagus altifrons	Animalia	Chordata	Actinopterygii	Cichliformes	Cichlidae	Geophagus	altifrons	species	NA	NA	Ximenes, AM & Machado, VN	-3390489	-57722472	Brazil	NA	Maués-Açu	2019-05-01	Maués-Açu- Amazonas, Brazil	14-Middle-Lower Madeira	Maués-Açu lake	Aline Ximenes	17571	17571
TRUE	17572	17572	UFAM	CTGA	MaterialSample	Other material	Geophagus altifrons	Animalia	Chordata	Actinopterygii	Cichliformes	Cichlidae	Geophagus	altifrons	species	NA	NA	Ximenes, AM & Machado, VN	-3390489	-57722472	Brazil	NA	Maués-Açu	2019-05-01	Maués-Açu- Amazonas, Brazil	14-Middle-Lower Madeira	Maués-Açu lake	Aline Ximenes	17572	17572
TRUE	17573	17573	UFAM	CTGA	MaterialSample	Other material	Geophagus altifrons	Animalia	Chordata	Actinopterygii	Cichliformes	Cichlidae	Geophagus	altifrons	species	NA	NA	Ximenes, AM & Machado, VN	-3390489	-57722472	Brazil	NA	Maués-Açu	2019-05-01	Maués-Açu- Amazonas, Brazil	14-Middle-Lower Madeira	Maués-Açu lake	Aline Ximenes	17573	17573
TRUE	17574	17574	UFAM	CTGA	MaterialSample	Other material	Geophagus altifrons	Animalia	Chordata	Actinopterygii	Cichliformes	Cichlidae	Geophagus	altifrons	species	NA	NA	Ximenes, AM & Machado, VN	-3390489	-57722472	Brazil	NA	Maués-Açu	2019-05-01	Maués-Açu- Amazonas, Brazil	14-Middle-Lower Madeira	Maués-Açu lake	Aline Ximenes	17574	17574
TRUE	17578	17578	UFAM	CTGA	MaterialSample	Other material	Geophagus altifrons	Animalia	Chordata	Actinopterygii	Cichliformes	Cichlidae	Geophagus	altifrons	species	NA	NA	Ximenes, AM & Machado, VN	-34491	-57735325	Brazil	NA	Maués-Açu	2019-05-01	Maués-Açu- Amazonas, Brazil	14-Middle-Lower Madeira	Maués-Açu lake	Aline Ximenes	17578	17578
TRUE	17579	17579	UFAM	CTGA	MaterialSample	Other material	Geophagus altifrons	Animalia	Chordata	Actinopterygii	Cichliformes	Cichlidae	Geophagus	altifrons	species	NA	NA	Ximenes, AM & Machado, VN	-34491	-57735325	Brazil	NA	Maués-Açu	2019-05-01	Maués-Açu- Amazonas, Brazil	14-Middle-Lower Madeira	Maués-Açu lake	Aline Ximenes	17579	17579
TRUE	1616	1616	UFAM	CTGA	MaterialSample	Other material	Geophagus altifrons	Animalia	Chordata	Actinopterygii	Cichliformes	Cichlidae	Geophagus	altifrons	species	NA	field identified as Geophagus cf altifrons	NA	-6276008	-57739997	Brazil	NA	Tapajós	NA	Tapajós- Jacareacanga- Pará, Brazil	9-Tapajós	Upper Tapajós River	NA	1616	1616
TRUE	2673	2673	UFAM	CTGA	MaterialSample	Other material	Geophagus altifrons	Animalia	Chordata	Actinopterygii	Cichliformes	Cichlidae	Geophagus	altifrons	species	NA	NA	NA	-6276008	-57739997	Brazil	NA	Tapajós	NA	Tapajós- Jacareacanga- Pará, Brazil	9-Tapajós	Upper Tapajós River	NA	2673	2673
TRUE	11549	11549	UFAM	CTGA	MaterialSample	Other material	Geophagus altifrons	Animalia	Chordata	Actinopterygii	Cichliformes	Cichlidae	Geophagus	altifrons	species	NA	field identified as Geophagus cf altifrons	NA	-4548861	-56269083	Brazil	NA	Tapajós	NA	Tapajós-upper Itaituba Pará, Brazil	9-Tapajós	Middle Tapajós River	NA	11549	11549
TRUE	11550	11550	UFAM	CTGA	MaterialSample	Other material	NA	Animalia	Chordata	Actinopterygii	Cichliformes	Cichlidae	Geophagus		genus	sp 4	NA	NA	-4548861	-56269083	Brazil	NA	Tapajós	NA	Tapajós-upper Itaituba Pará, Brazil	9-Tapajós	Middle Tapajós River	NA	11550	11550
TRUE	11555	11555	UFAM	CTGA	MaterialSample	Other material	NA	Animalia	Chordata	Actinopterygii	Cichliformes	Cichlidae	Geophagus		genus	sp 4	NA	NA	-4548861	-56269083	Brazil	NA	Tapajós	NA	Tapajós-upper Itaituba Pará, Brazil	9-Tapajós	Middle Tapajós River	NA	11555	11555
TRUE	11781	11781	UFAM	CTGA	MaterialSample	Other material	NA	Animalia	Chordata	Actinopterygii	Cichliformes	Cichlidae	Geophagus		genus	sp 4	NA	NA	-4548861	-56269083	Brazil	NA	Tapajós	NA	Tapajós-upper Itaituba Pará, Brazil	9-Tapajós	Middle Tapajós River	NA	11781	11781
TRUE	11782	11782	UFAM	CTGA	MaterialSample	Other material	NA	Animalia	Chordata	Actinopterygii	Cichliformes	Cichlidae	Geophagus		genus	sp 1	NA	NA	-4548861	-56269083	Brazil	NA	Tapajós	NA	Tapajós-upper Itaituba Pará, Brazil	9-Tapajós	Middle Tapajós River	NA	11782	11782
TRUE	15374	15374	UFAM	CTGA	MaterialSample	Other material	Geophagus altifrons	Animalia	Chordata	Actinopterygii	Cichliformes	Cichlidae	Geophagus	altifrons	species	NA	NA	NA	-5631086	-57240375	Brazil	NA	Tapajós	NA	Tapajós- lower Jacareacanga- Pará, Brazil	9-Tapajós	Upper Middle Tapajós River	NA	15374	15374
TRUE	104248	104248	UFAM/INPA	SISBIOTA	MaterialSample	Other material	NA	Animalia	Chordata	Actinopterygii	Cichliformes	Cichlidae	Geophagus		genus	sp 1	field identified ass Geophagus proximus	NA	-3102939	-551097	Brazil	NA	Tapajós	NA	Tapajós- Lower Aveiro Pará, Brazil	9-Tapajós	Lower Tapajós River	NA	104248	104248
TRUE	104573	104573	UFAM/INPA	SISBIOTA	MaterialSample	Other material	NA	Animalia	Chordata	Actinopterygii	Cichliformes	Cichlidae	Geophagus		genus	sp 1	field identified as Geophagus proximus	NA	-3102939	-551097	Brazil	NA	Tapajós	NA	Tapajós- Lower Aveiro Pará, Brazil	9-Tapajós	Lower Tapajós River	NA	104573	104573
TRUE	104574	104574	UFAM/INPA	SISBIOTA	MaterialSample	Other material	NA	Animalia	Chordata	Actinopterygii	Cichliformes	Cichlidae	Geophagus		genus	sp 1	field identified as Geophagus proximus	NA	-3102939	-551097	Brazil	NA	Tapajós	NA	Tapajós- Lower Aveiro Pará, Brazil	9-Tapajós	Lower Tapajós River	NA	104574	104574
TRUE	104575	104575	UFAM/INPA	SISBIOTA	MaterialSample	Other material	NA	Animalia	Chordata	Actinopterygii	Cichliformes	Cichlidae	Geophagus		genus	sp 1	field identified as Geophagus proximus	NA	-3102939	-551097	Brazil	NA	Tapajós	NA	Tapajós- Lower Aveiro Pará, Brazil	9-Tapajós	Lower Tapajós River	NA	104575	104575
TRUE	104576	104576	UFAM/INPA	SISBIOTA	MaterialSample	Other material	NA	Animalia	Chordata	Actinopterygii	Cichliformes	Cichlidae	Geophagus		genus	sp 5	field identified as Geophagus proximus	NA	-3102939	-551097	Brazil	NA	Tapajós	NA	Tapajós- Lower Aveiro Pará, Brazil	9-Tapajós	Lower Tapajós River	NA	104576	104576
TRUE	104577	104577	UFAM/INPA	SISBIOTA	MaterialSample	Other material	NA	Animalia	Chordata	Actinopterygii	Cichliformes	Cichlidae	Geophagus		genus	sp 1	field identified as Geophagus proximus	NA	-3102939	-551097	Brazil	NA	Tapajós	NA	Tapajós- Lower Aveiro Pará, Brazil	9-Tapajós	Lower Tapajós River	NA	104577	104577
TRUE	104693	104693	UFAM/INPA	SISBIOTA	MaterialSample	Other material	Geophagus altifrons	Animalia	Chordata	Actinopterygii	Cichliformes	Cichlidae	Geophagus	altifrons	species	NA	field identified as Geophagus cf proximus	NA	-3300833	-55305556	Brazil	NA	Tapajós	NA	Tapajós- Lower Aveiro Pará, Brazil	9-Tapajós	Lower Tapajós River	NA	104693	104693
TRUE	104996	104696	UFAM/INPA	SISBIOTA	MaterialSample	Other material	Geophagus altifrons	Animalia	Chordata	Actinopterygii	Cichliformes	Cichlidae	Geophagus	altifrons	species	NA	field identified as Geophagus cf altifrons	NA	-3300833	-55305556	Brazil	NA	Tapajós	NA	Tapajós- Lower Aveiro Pará, Brazil	9-Tapajós	Lower Tapajós River	NA	104996	104996
TRUE	104697	104697	UFAM/INPA	SISBIOTA	MaterialSample	Other material	Geophagus altifrons	Animalia	Chordata	Actinopterygii	Cichliformes	Cichlidae	Geophagus	altifrons	species	NA	field identified as Geophagus cf altifrons	NA	-3300833	-55305556	Brazil	NA	Tapajós	NA	Tapajós- Lower Aveiro Pará, Brazil	9-Tapajós	Lower Tapajós River	NA	104697	104697
TRUE	17445	17445	UFAM	CTGA	MaterialSample	Other material	Geophagus altifrons	Animalia	Chordata	Actinopterygii	Cichliformes	Cichlidae	Geophagus	altifrons	species	NA	NA	NA	-4880442	-49429542	Brazil	NA	Tocantins	2018-10-01	Tocantins- Itupiranga- Pará, Brazil	3-Lower Tocantins	Lower Tocantins River	Joiciane Farias	17445	17445
TRUE	17448	17448	UFAM	CTGA	MaterialSample	Other material	Geophagus altifrons	Animalia	Chordata	Actinopterygii	Cichliformes	Cichlidae	Geophagus	altifrons	species	NA	NA	NA	-3831206	-49648347	Brazil	NA	Tocantins	2018-10-01	Tocantins- Tucuruí- Pará, Brazil	3-Lower Tocantins	Lower Tocantins River	Joiciane Farias	17448	17448
TRUE	17449	17449	UFAM	CTGA	MaterialSample	Other material	Geophagus altifrons	Animalia	Chordata	Actinopterygii	Cichliformes	Cichlidae	Geophagus	altifrons	species	NA	NA	NA	-3831206	-49648347	Brazil	NA	Tocantins	2018-10-01	Tocantins- Tucuruí- Pará, Brazil	3-Lower Tocantins	Lower Tocantins River	Joiciane Farias	17449	17449
TRUE	17452	17452	UFAM	CTGA	MaterialSample	Other material	Geophagus altifrons	Animalia	Chordata	Actinopterygii	Cichliformes	Cichlidae	Geophagus	altifrons	species	NA	NA	NA	-1895453	-49355981	Brazil	NA	Tocantins	2018-10-01	Tocantins- Limoeiro_Baía do Marapatá- Pará, Brazil	29-Amazonas Estuary	Baía do Marapatá-Lower Amazonas River	Joiciane Farias	17452	17452
TRUE	17450	17450	UFAM	CTGA	MaterialSample	Other material	Geophagus altifrons	Animalia	Chordata	Actinopterygii	Cichliformes	Cichlidae	Geophagus	altifrons	species	NA	NA	NA	-3831206	-49648347	Brazil	NA	Tocantins	2018-10-01	Tocantins- Tucuruí- Pará, Brazil	3-Lower Tocantins	Lower Tocantins River	Joiciane Farias	17450	17450
TRUE	17451	17451	UFAM	CTGA	MaterialSample	Other material	Geophagus altifrons	Animalia	Chordata	Actinopterygii	Cichliformes	Cichlidae	Geophagus	altifrons	species	NA	NA	NA	-1895453	-49355981	Brazil	NA	Tocantins	2018-10-01	Tocantins- Limoeiro_Baía do Marapatá- Pará, Brazil	29-Amazonas Estuary	Baía do Marapatá-Lower Amazonas River	Joiciane Farias	17451	17451
TRUE	17453	17453	UFAM	CTGA	MaterialSample	Other material	Geophagus altifrons	Animalia	Chordata	Actinopterygii	Cichliformes	Cichlidae	Geophagus	altifrons	species	NA	NA	NA	-1895453	-49355981	Brazil	NA	Tocantins	2018-10-01	Tocantins- Limoeiro_Baía do Marapatá- Pará, Brazil	29-Amazonas Estuary	Baía do Marapatá-Lower Amazonas River	Joiciane Farias	17453	17453
TRUE	17454	17454	UFAM	CTGA	MaterialSample	Other material	Geophagus altifrons	Animalia	Chordata	Actinopterygii	Cichliformes	Cichlidae	Geophagus	altifrons	species	NA	NA	NA	-1895453	-49355981	Brazil	NA	Tocantins	2018-10-01	Tocantins- Limoeiro_Baía do Marapatá- Pará, Brazil	29-Amazonas Estuary	Baía do Marapatá-Lower Amazonas River	Joiciane Farias	17454	17454
TRUE	17455	17455	UFAM	CTGA	MaterialSample	Other material	Geophagus altifrons	Animalia	Chordata	Actinopterygii	Cichliformes	Cichlidae	Geophagus	altifrons	species	NA	NA	NA	-1895453	-49355981	Brazil	NA	Tocantins	2018-10-01	Tocantins- Limoeiro_Baía do Marapatá- Pará, Brazil	29-Amazonas Estuary	Baía do Marapatá-Lower Amazonas River	Joiciane Farias	17455	17455
TRUE	364	364	UFAM	CTGA	MaterialSample	Other material	Geophagus proximus	Animalia	Chordata	Actinopterygii	Cichliformes	Cichlidae	Geophagus	proximus	species	NA	NA	NA	-1738369	-55883078	Brazil	NA	Trombetas	NA	Trombetas- Oriximiná- Pará, Brazil	26-Trombetas	Lower Trombetas River	NA	364	364
TRUE	362	362	UFAM	CTGA	MaterialSample	Other material	Geophagus proximus	Animalia	Chordata	Actinopterygii	Cichliformes	Cichlidae	Geophagus	proximus	species	NA	NA	NA	-1738369	-55883078	Brazil	NA	Trombetas	NA	Trombetas- Oriximiná- Pará, Brazil	26-Trombetas	Lower Trombetas River	NA	362	362
TRUE	365	365	UFAM	CTGA	MaterialSample	Other material	Geophagus altifrons	Animalia	Chordata	Actinopterygii	Cichliformes	Cichlidae	Geophagus	altifrons	species	NA	NA	NA	-1738369	-55883078	Brazil	NA	Trombetas	NA	Trombetas- Oriximiná- Pará, Brazil	26-Trombetas	Lower Trombetas River	NA	365	365
TRUE	17646	17646	UFAM	CTGA	MaterialSample	Other material	Geophagus altifrons	Animalia	Chordata	Actinopterygii	Cichliformes	Cichlidae	Geophagus	altifrons	species	NA	NA	NA	-1467592	-56308361	Brazil	NA	Trombetas	NA	Trombetas- Lago Mussurá- Pará, Brazil	26-Trombetas	Lower Trombetas River	NA	17646	17646
TRUE	363	363	UFAM	CTGA	MaterialSample	Other material	Geophagus proximus	Animalia	Chordata	Actinopterygii	Cichliformes	Cichlidae	Geophagus	proximus	species	NA	NA	NA	-1738369	-55883078	Brazil	NA	Trombetas	NA	Trombetas- Oriximiná- Pará, Brazil	26-Trombetas	Lower Trombetas River	NA	363	363
TRUE	16885	16885	UFAM	CTGA	MaterialSample	Other material	Geophagus altifrons	Animalia	Chordata	Actinopterygii	Cichliformes	Cichlidae	Geophagus	altifrons	species	NA	NA	NA	-1910383	-59459939	Brazil	NA	Uatumã	2018-11-01	Uatumã- Amazonas, Brazil	25-Urubu-Uatumã	Balbina Hydroelectric	Igor Joventino	16885	16885
TRUE	16887	16887	UFAM	CTGA	MaterialSample	Other material	Geophagus altifrons	Animalia	Chordata	Actinopterygii	Cichliformes	Cichlidae	Geophagus	altifrons	species	NA	NA	NA	-1910383	-59459939	Brazil	NA	Uatumã	2018-12-01	Uatumã- Amazonas, Brazil	25-Urubu-Uatumã	Balbina Hydroelectric	Igor Joventino	16887	16887
TRUE	25136	25136	INPA	ICT	MaterialSample	Other material	NA	Animalia	Chordata	Actinopterygii	Cichliformes	Cichlidae	Geophagus		genus	sp 1	NA	NA	-2865444	-51989333	Brazil	NA	Xingu	2014-03-01	Xingu- igarapé Tucuruí- Pará, Brazil	6-Lower Xingu	Lower Xingu River	NA	25136	25136
TRUE	24030	24030	INPA	ICT	MaterialSample	Other material	Geophagus altifrons	Animalia	Chordata	Actinopterygii	Cichliformes	Cichlidae	Geophagus	altifrons	species	NA	field identified as Geophagus cf altifrons	NA	-3092222	-51737222	Brazil	NA	Xingu	NA	Xingu- Favânia-Belo Monte- Pará, Brazil	6-Lower Xingu	Lower Xingu River	NA	24030	24030
TRUE	24111	24111	INPA	ICT	MaterialSample	Other material	Geophagus altifrons	Animalia	Chordata	Actinopterygii	Cichliformes	Cichlidae	Geophagus	altifrons	species	NA	field identified as Geophagus cf altifrons	NA	-2888333	-51.94	Brazil	NA	Xingu	NA	Xingu- Vitória do Xingu- Pará, Brazil	6-Lower Xingu	Lower Xingu River	NA	24111	24111
TRUE	24196	24196	INPA	ICT	MaterialSample	Other material	Geophagus altifrons	Animalia	Chordata	Actinopterygii	Cichliformes	Cichlidae	Geophagus	altifrons	species	NA	field identified as Geophagus cf altifrons	NA	-2880833	-520125	Brazil	NA	Xingu	NA	Xingu- Vitória do Xingu- Pará, Brazil	6-Lower Xingu	Lower Xingu River	NA	24196	24196
TRUE	24215	24215	INPA	ICT	MaterialSample	Other material	NA	Animalia	Chordata	Actinopterygii	Cichliformes	Cichlidae	Geophagus		genus	sp 1	NA	NA	-2525556	-51963333	Brazil	NA	Xingu	NA	Xingu- Sen Jose Porfírio- Pará, Brazil	6-Lower Xingu	Lower Xingu River	NA	24215	24215
TRUE	24594	24594	INPA	ICT	MaterialSample	Other material	NA	Animalia	Chordata	Actinopterygii	Cichliformes	Cichlidae	Geophagus		genus	sp 3	NA	NA	-3143889	-51603056	Brazil	NA	Xingu	NA	Xingu- Tijucaquara-Volta Grande- Pará, Brazil	6-Lower Xingu	Lower Xingu River	NA	24594	24594
TRUE	24632	24632	INPA	ICT	MaterialSample	Other material	NA	Animalia	Chordata	Actinopterygii	Cichliformes	Cichlidae	Geophagus		genus	sp 3	NA	NA	-3129167	-516175	Brazil	NA	Xingu	NA	Xingu- Tijucaquara-Volta Grande- Pará, Brazil	6-Lower Xingu	Lower Xingu River	NA	24632	24632
TRUE	24757	24757	INPA	ICT	MaterialSample	Other material	Geophagus altifrons	Animalia	Chordata	Actinopterygii	Cichliformes	Cichlidae	Geophagus	altifrons	species	NA	field identified as Geophagus cf altifrons	NA	-3127778	-51690833	Brazil	NA	Xingu	NA	Xingu- Tijucaquara-Belo MonteII- Pará, Brazil	6-Lower Xingu	Lower Xingu River	NA	24757	24757
TRUE	25162	25162	INPA	ICT	MaterialSample	Other material	NA	Animalia	Chordata	Actinopterygii	Cichliformes	Cichlidae	Geophagus		genus	sp 3	NA	NA	-3559444	-51763889	Brazil	NA	Xingu	2014-03-14	Xingu- Volta Grande- Pará, Brazil	6-Lower Xingu	Lower Xingu River	NA	25162	25162
TRUE	26005	26005	INPA	ICT	MaterialSample	Other material	NA	Animalia	Chordata	Actinopterygii	Cichliformes	Cichlidae	Geophagus		genus	sp 3	NA	NA	-3382222	-51736389	Brazil	NA	Xingu	NA	Xingu- Volta Grande- Pará, Brazil	6-Lower Xingu	Lower Xingu River	NA	26005	26005
TRUE	26202	26202	INPA	ICT	MaterialSample	Other material	NA	Animalia	Chordata	Actinopterygii	Cichliformes	Cichlidae	Geophagus		genus	sp 3	NA	NA	-3583611	-51823056	Brazil	NA	Xingu	NA	Xingu- Volta Grande- Pará, Brazil	6-Lower Xingu	Lower Xingu River	NA	26202	26202
TRUE	26286	26286	INPA	ICT	MaterialSample	Other material	NA	Animalia	Chordata	Actinopterygii	Cichliformes	Cichlidae	Geophagus		genus	sp 1	field identified as Geophagus cf altifrons	NA	-1790278	-52220278	Brazil	NA	Xingu	NA	Xingu- upper Porto de Moz- Pará, Brazil	6-Lower Xingu	Lower Xingu River	NA	26286	26286
TRUE	26358	26358	INPA	ICT	MaterialSample	Other material	NA	Animalia	Chordata	Actinopterygii	Cichliformes	Cichlidae	Geophagus		genus	sp 1	field identified as Geophagus argyrostictus	NA	-1729722	-52255278	Brazil	NA	Xingu	2014-11-14	Xingu- lower Porto de Moz- Pará, Brazil	28-Amazonas main channel	Lower Xingu River	NA	26358	26358
TRUE	26514	26514	INPA	ICT	MaterialSample	Other material	NA	Animalia	Chordata	Actinopterygii	Cichliformes	Cichlidae	Geophagus		genus	sp 1	field identified as Geophagus cf altifrons	NA	-1779722	-52219722	Brazil	NA	Xingu	2014-11-17	Xingu- upper Porto de Moz- Pará, Brazil	6-Lower Xingu	Lower Xingu River	NA	26514	26514
TRUE	26764	26764	INPA	ICT	MaterialSample	Other material	NA	Animalia	Chordata	Actinopterygii	Cichliformes	Cichlidae	Geophagus		genus	sp 1	field identified as Geophagus cf neambi	NA	-2830306	-52024	Brazil	NA	Xingu	2014-11-01	Xingu- Vitória do Xingu- Pará, Brazil	6-Lower Xingu	Lower Xingu River	NA	26764	26764
TRUE	24860	24860	INPA	ICT	MaterialSample	Other material	NA	Animalia	Chordata	Actinopterygii	Cichliformes	Cichlidae	Geophagus		genus	sp 1	NA	NA	-1731389	-52254444	Brazil	NA	Xingu	NA	Xingu- lower Porto de Moz- Pará, Brazil	28-Amazonas main channel	Lower Xingu River	NA	24860	24860
TRUE	8033	8033	UNIR	GEN	MaterialSample	Other material	Geophagus megasema	Animalia	Chordata	Actinopterygii	Cichliformes	Cichlidae	Geophagus	megasema	species	NA	NA	Cella-Ribeiro, A.	-5824222	-61320028	Brazil	NA	Madeira	NA	Manicore- Amazonas, Brazil	14-Middle-Lower Madeira	Manicore confluence with lower Madeira	Cella-Ribeiro, A.	8033	8033
TRUE	5002	5002	UNIR	GEN	MaterialSample	Other material	NA	Animalia	Chordata	Actinopterygii	Cichliformes	Cichlidae	Geophagus		genus	sp 1	field identified as Geophagus megasema	Cella-Ribeiro, A.	-5824222	-61320028	Brazil	NA	Madeira	NA	Manicore- Amazonas, Brazil	14-Middle-Lower Madeira	Manicore confluence with lower Madeira	Cella-Ribeiro, A.	5002	5002
TRUE	8760	8760	UNIR	GEN	MaterialSample	Other material	Geophagus megasema	Animalia	Chordata	Actinopterygii	Cichliformes	Cichlidae	Geophagus	megasema	species	NA	NA	Cella-Ribeiro, A.	-5824222	-61320028	Brazil	NA	Madeira	NA	Manicore- Amazonas, Brazil	14-Middle-Lower Madeira	Manicore confluence with lower Madeira	Cella-Ribeiro, A.	8760	8760
TRUE	23	23	UFAM	CTGA	MaterialSample	Other material	Geophagus proximus	Animalia	Chordata	Actinopterygii	Cichliformes	Cichlidae	Geophagus	proximus	species	NA	NA	Ximenes, AM	-4087056	-63191647	Brazil	NA	Coari	2018-10-01	Coari- Amazonas, Brazil	28-Amazonas main channel	Coari Lake- Solimões River	Aline Ximenes	23	23
TRUE	17660	17660	UFAM	CTGA	MaterialSample	Other material	NA	Animalia	Chordata	Actinopterygii	Cichliformes	Cichlidae	Geophagus		genus	sp 1	NA	Carlisom Oliveira	-1609396	-5437144	Brazil	NA	Maicuru	2019-10-02	Monte Alegre- Pará, Brazil	26-Trombetas	Lower Maiucuru River	Carlison Oliveira	17660	17660
