# Supplementary material for: Mapping the hidden diversity of the Geophagus sensu stricto species group (Cichlidae: Geophagini) from the Amazon basin
Source: PeerJ journal article supplement (doi:10.7717/peerj.12443), 2021-11-30

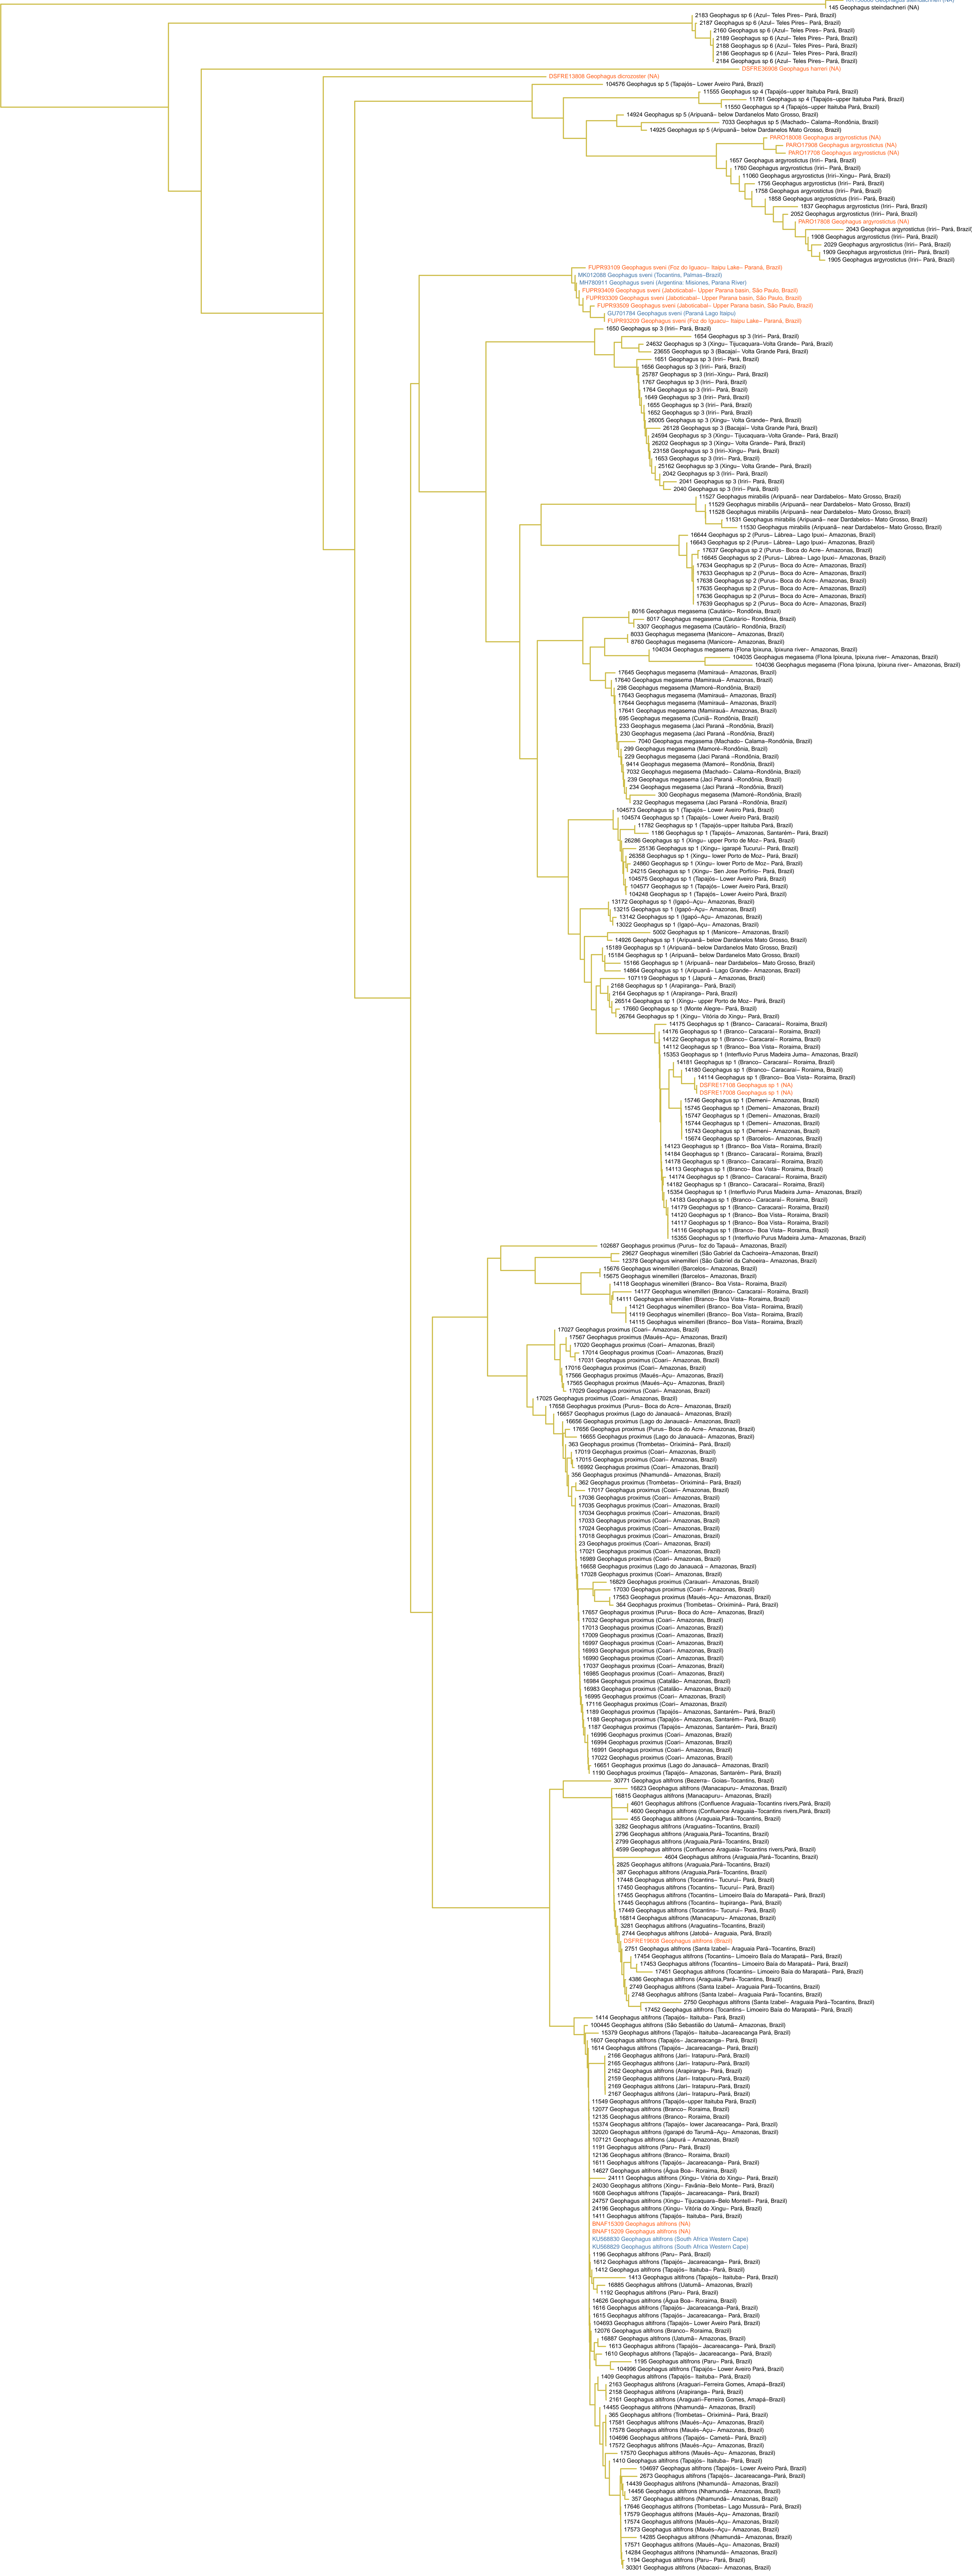

Supplement: Supplemental_Fig_1._Neighbour_joining_phylogenetic_tree_.pdf [file Supplemental_Fig_1._Neighbour_joining_phylogenetic_tree_.pdf]
